# Supplementary material for: How information about overdetection changes breast cancer screening decisions: a mediation analysis within a randomised controlled trial
Source: PubMed Central journal article supplement — BMJ Open. 2017 Oct 6;7(10):e016246. doi: 10.1136/bmjopen-2017-016246 (PMC5640026; doi:10.1136/bmjopen-2017-016246), 2017-10-06
Supplement: bmjopen-2017-016246.draft_revisions.pdf [file bmjopen-2017-016246.draft_revisions.pdf]

# BMJ Open

BMJ Open is committed to open peer review. As part of this commitment we make the peer review history of every article we publish publicly available.

When an article is published we post the peer reviewers' comments and the authors' responses online. We also post the versions of the paper that were used during peer review. These are the versions that the peer review comments apply to.

The versions of the paper that follow are the versions that were submitted during the peer review process. They are not the versions of record or the final published versions. They should not be cited or distributed as the published version of this manuscript.

BMJ Open is an open access journal and the full, final, typeset and author-corrected version of record of the manuscript is available on our site with no access controls, subscription charges or pay-per-view fees (<http://bmjopen.bmj.com>).

If you have any questions on BMJ Open's open peer review process please email [editorial.bmjopen@bmj.com](mailto:editorial.bmjopen@bmj.com)

# BMJ Open

## How information about overdiagnosis changes breast cancer screening decisions: a mediation analysis within a randomised controlled trial

|                                 |                                                                                                                                                                                                                                                                                                                                                                                                                                                                                                                                                                                                               |
|---------------------------------|---------------------------------------------------------------------------------------------------------------------------------------------------------------------------------------------------------------------------------------------------------------------------------------------------------------------------------------------------------------------------------------------------------------------------------------------------------------------------------------------------------------------------------------------------------------------------------------------------------------|
| Journal:                        | <i>BMJ Open</i>                                                                                                                                                                                                                                                                                                                                                                                                                                                                                                                                                                                               |
| Manuscript ID                   | bmjopen-2017-016246                                                                                                                                                                                                                                                                                                                                                                                                                                                                                                                                                                                           |
| Article Type:                   | Research                                                                                                                                                                                                                                                                                                                                                                                                                                                                                                                                                                                                      |
| Date Submitted by the Author:   | 02-Feb-2017                                                                                                                                                                                                                                                                                                                                                                                                                                                                                                                                                                                                   |
| Complete List of Authors:       | Hersch, Jolyn; University of Sydney, School of Public Health<br>McGeechan, Kevin; University of Sydney, School of Public Health<br>Barratt, Alexandra; University of Sydney, School of Public Health<br>Jansen, Jesse; University of Sydney, School of Public Health<br>Irwig, Les; University of Sydney, School of Public Health<br>Jacklyn, Gemma; University of Sydney, School of Public Health<br>Houssami, Nehmat; University of Sydney, School of Public Health<br>Dhillon, Haryana; University of Sydney, Central Clinical School<br>McCaffery, Kirsten; University of Sydney, School of Public Health |
| <b>Primary Subject Heading</b>: | Communication                                                                                                                                                                                                                                                                                                                                                                                                                                                                                                                                                                                                 |
| Secondary Subject Heading:      | Public health                                                                                                                                                                                                                                                                                                                                                                                                                                                                                                                                                                                                 |
| Keywords:                       | Breast imaging < RADIOLOGY & IMAGING, Overdiagnosis, Decision aid, Informed decision making, Cancer screening, Mediation                                                                                                                                                                                                                                                                                                                                                                                                                                                                                      |
|                                 |                                                                                                                                                                                                                                                                                                                                                                                                                                                                                                                                                                                                               |

SCHOLARONE™  
Manuscripts

only

**TITLE**

How information about overdetection changes breast cancer screening decisions: a mediation analysis within a randomised controlled trial

**AUTHORS**

Jolyn Hersch<sup>1,2,3</sup>, jolyn.hersch@sydney.edu.au (corresponding author)

Kevin McGeechan<sup>1,2,3</sup>, kevin.mcgeechan@sydney.edu.au

Alexandra Barratt<sup>1,2,3</sup>, alexandra.barratt@sydney.edu.au

Jesse Jansen<sup>1,2,3</sup>, jesse.jansen@sydney.edu.au

Les Irwig<sup>1,2</sup>, les.irwig@sydney.edu.au

Gemma Jacklyn<sup>1,2</sup>, gemma.jacklyn@sydney.edu.au

Nehmat Houssami<sup>1,2</sup>, nehmat.houssami@sydney.edu.au

Haryana Dhillon<sup>3,4</sup>, haryana.dhillon@sydney.edu.au

Kirsten McCaffery<sup>1,2,3</sup>, kirsten.mccaffery@sydney.edu.au

**AFFILIATIONS**

<sup>1</sup>School of Public Health, Sydney Medical School, The University of Sydney, Australia.

<sup>2</sup>Wiser Healthcare, The University of Sydney, Australia.

<sup>3</sup>Centre for Medical Psychology and Evidence-based Decision-making (CeMPED), The University of Sydney, Australia.

<sup>4</sup>Central Clinical School, Sydney Medical School, The University of Sydney, Australia.

**CORRESPONDING AUTHOR**

Jolyn Hersch

School of Public Health  
Level 1, Edward Ford Building (A27)  
The University of Sydney  
NSW 2006  
AUSTRALIA

jolyn.hersch@sydney.edu.au

+612 9036 9042

**WORD COUNT**

2254

**ABSTRACT**

Objectives: In a randomised controlled trial, we found that informing women about overdetected changed their breast screening decisions. We now present a mediation analysis aimed at exploring the pathways through which study participants who received the intervention processed information about overdetected and integrated it into their decision making. We examined a series of potential mediators of the relationship between exposure to this information and subsequent breast screening intentions.

Design: Serial multiple mediation analysis within a randomised controlled trial

Setting: New South Wales, Australia

Participants: 811 women aged 48–50 years with no personal history of breast cancer

Interventions: Two versions of a decision aid giving women information about breast cancer deaths averted and false positives from screening, either with (intervention) or without (control) information on overdetected.

Main outcome: Intentions to undergo breast screening in the next 2–3 years

Mediators: Knowledge about overdetected, worry about breast cancer, attitudes towards breast screening, and anticipated regret

Results: The effect of information about overdetected on women's breast screening intentions was mediated through multiple cognitive and affective pathways. In particular, the information led to substantial improvements in women's understanding of overdetected, and it influenced – both directly and indirectly via its effect on knowledge – their attitudes towards having screening. Mediation analysis showed that the mechanisms involving knowledge and attitudes were particularly important in determining intentions about screening participation.

Conclusions: Even in this emotive context, new information influenced women's decision making by changing their understanding of possible consequences of screening and their attitudes towards undergoing it. These findings emphasise the need to provide good-quality information on screening outcomes, and to communicate this information effectively, so that women can make well-informed decisions.

Trial registration: This study was prospectively registered with the Australian New Zealand Clinical Trials Registry (ACTRN12613001035718) on 17 September 2013.

**STRENGTHS AND LIMITATIONS OF THIS STUDY**

- Random allocation between two decision aids, differing only in the presence or absence of information about overdiagnosis, enabled a rigorous test of the specific effects of this information when described in the context of other screening outcomes.
- Participants were women entering the target age range for breast screening, who were sampled randomly from the general community and were facing real decisions.
- Our serial mediation model controlled for a comprehensive set of baseline variables and examined plausible, theory-driven cause-effect relationships between exposure to the intervention and subsequently measured variables.
- Nonetheless, given the cross-sectional nature of the outcome and mediator data, we cannot definitively establish the causal ordering of these variables.

**KEYWORDS**

Breast imaging

Overdiagnosis

Decision aid

Informed decision making

Cancer screening

Mediation

1  
2  
3 Breast cancer screening is a complex and emotionally charged issue,[1] a topic surrounded by what  
4 has been described as a perfect storm of politics and science.[2] While screening can reduce deaths  
5 from breast cancer, it can also cause harm through the counterintuitive phenomenon of  
6 overdetection. An overdetection breast cancer is one found by screening, and consequently treated,  
7 that would not have caused any health problems had it been left undetected and untreated.[3]  
8 Without screening, such a cancer would never have been diagnosed. Overdetected cancers are 'real'  
9 cancers in the sense that they meet current pathological criteria for cancer diagnosis, but finding and  
10 treating them does not improve health outcomes. Such a diagnosis and the resulting treatment can  
11 cause serious lifelong harm, and overdetection is therefore considered the major downside to breast  
12 screening.

13  
14 Mounting evidence of the extent of overdetection (estimated as 19% of breast cancers diagnosed in  
15 women invited to screen [4] and 30% for those who attend screening [5]) has led to recognition that  
16 the benefits and harms of breast screening are finely balanced for women at population-level risk of  
17 breast cancer. The risk of overdetection and its consequences must be weighed against the benefit  
18 of reducing breast cancer mortality (relative risk reduction estimated as 20% for women invited to  
19 screen [4] and 30% for those screened [5]). Experts familiar with the evidence now acknowledge that  
20 individual women may perceive the harm-benefit trade-off differently depending on their personal  
21 context and preferences – some will opt for screening while others decline, and either choice may be  
22 appropriate if it represents an informed decision.[6-8] Throughout the history of breast screening,  
23 however, women invited to participate have not been given all the relevant information.[9-11]  
24 Consensus is growing that information on screening benefits and harms, including overdetection,  
25 must be communicated clearly and transparently to women offered screening so that they can make  
26 informed decisions about whether to be screened.[4, 12, 13] This is all the more important because  
27 of evidence that women hold misconceptions about breast screening and its effects.[14, 15]

28  
29 Against the background of this recommended shift in communication, the issue of how information  
30 about overdetection affects women and their screening decisions is critical. In a randomised trial we  
31 addressed this question in women approaching the recommended age for mammography  
32 screening.[16] We sent women one of two versions of a decision aid (evidence-based information  
33 booklet) giving information about breast cancer deaths averted and false positives from screening  
34 (abnormal mammograms in women without cancer), either with or without information on  
35 overdetection.[17] The intervention produced several significant effects on decision making.[16] The  
36 additional overdetection information improved knowledge, increased the number of women making  
37  
38  
39  
40  
41  
42  
43  
44  
45  
46  
47  
48  
49  
50  
51  
52  
53  
54  
55  
56  
57  
58  
59  
60

1  
2  
3 an informed choice about screening, and reduced positive attitudes to screening and the number of  
4 women intending to be screened.[16]  
5  
6

7 From our study design – chosen to identify the specific impact of information about overdetec-  
8 ition – it appears that communicating this information influenced women’s assessment of the value of  
9 screening to them, leading to lower intentions to be screened within the intervention group. This  
10 finding has never been observed before, and raises important questions. In this paper we explore  
11 the psychological pathways through which study participants processed overdetec-  
12 tion information and integrated it into their decision making. We provide an explanatory account incorporating  
13 cognitive and affective pathways, using psychological theories [18] and mediation analysis.[19]  
14  
15  
16  
17  
18

## 19 **METHODS**

20  
21 We did a parallel-group randomised controlled trial with women aged 48-50 years, recruited from  
22 the general community in New South Wales, Australia. The trial is described in detail elsewhere.[16,  
23 20] Trained interviewers from an independent non-profit company recruited participants via  
24 telephone. Women were eligible if they had not undergone mammography in the past 2 years and  
25 did not have a personal or strong family history of breast cancer. Participants knew they would  
26 receive one of two versions of a breast screening information booklet but did not know how these  
27 differed or which was the intervention.  
28  
29  
30  
31  
32

33  
34 We collected sociodemographics and baseline data on women’s stage of decision making (how far  
35 along they were with their decision about breast screening), basic conceptual knowledge, attitudes,  
36 and intentions.[16, 20] We randomly assigned 879 women to the intervention (n=440) or control  
37 group (n=439), then sent their allocated decision aid by post. A programmer who had no contact  
38 with participants generated the randomisation sequence, which was inaccessible until after  
39 recruitment, ensuring allocation concealment.  
40  
41  
42  
43

44  
45 The intervention decision aid contained evidence-based explanatory and quantitative information  
46 about important outcomes of undergoing screening biennially from age 50 to 69 years (breast  
47 cancer mortality reduction, overdetec-  
48 tion, and false positives) compared with not screening over  
49 this period. The control decision aid omitted all overdetec-  
50 tion content but was otherwise identical to  
51 the intervention. The decision aids were short booklets combining text and visual formats, and are  
52 published.[16, 17]  
53  
54

55  
56 We collected follow-up data using standardised questions in a structured telephone interview, 1-4  
57 weeks after randomisation. The participant’s group assignment was unclear to the interviewer until  
58 the final question.  
59  
60

1  
2  
3 Our knowledge scale assessed conceptual understanding of three key screening outcomes (breast  
4 cancer mortality reduction, overdetected, and false positives) and awareness of the approximate  
5 numbers affected.[16] For the mediation analysis we used the overdetected knowledge subscale  
6 (scored 0 to 10, including conceptual and numeric components) as conveying this new information  
7 was the main aim of the intervention. We assessed attitudes to breast screening via a widely used 6-  
8 item instrument (possible range 6 to 30), intentions to undergo screening in the next 2-3 years (1  
9 item, 5-point response scale), and worry about developing breast cancer (1 item, 4-point scale).[16,  
10 20, 21] Higher scores on these measures reflect better knowledge, more positive attitudes and  
11 intentions, and greater worry, respectively. We collected anticipated regret both for screening  
12 (action) and *not* screening (inaction),[22] and calculated a differential anticipated regret score [23]  
13 by subtracting the action from the inaction score. Higher scores on the resulting measure (possible  
14 range -4 to 4) reflect greater anticipated regret for *not* screening, adjusted for the woman's  
15 anticipated regret for screening.

16  
17 Our purpose in the analysis reported here was to explore causal pathways between exposure to  
18 information about overdetected in a decision aid (intervention) and subsequent breast screening  
19 intentions (outcome). We examined a series of potential mediators of this relationship: knowledge  
20 about overdetected, worry about breast cancer, attitudes towards breast screening, and anticipated  
21 regret. We tested whether these variables functioned in a chain with a specified direction of causal  
22 flow (serial mediation).[19] Based on health psychology theories (e.g., theory of planned behaviour  
23 [24, 25]) we tested the following causal chain: intervention (group allocation) -> overdetected  
24 knowledge -> worry -> attitudes -> anticipated regret -> intentions.

25  
26 Mediation models were tested using the PROCESS macro (Version 2.16) for SPSS (Version 24).[19]  
27 Baseline variables in Table 1 were statistically controlled by including them as covariates during  
28 mediation analyses. Outcome and mediator variables were standardised (expressed in units of  
29 standard deviations from the sample mean) for the mediation analysis. We used 50,000 bootstrap  
30 samples to create 95% bias-corrected confidence intervals (95% CIs) for the indirect effects (IEs),  
31 which we considered significant if the CI did not include zero.

## 32 33 34 35 36 37 38 39 40 41 42 43 44 45 46 47 48 49 **RESULTS**

50  
51 Of 879 participants randomised, 838 completed the follow-up interview. Among these, 27 did not  
52 answer all relevant questions and were excluded from the mediation analysis. Sociodemographic  
53 characteristics were similar for randomised participants who were and were not included in the  
54 mediation analysis. Table 1 shows baseline characteristics of the 811 included participants.



Table 1. Baseline sample characteristics (n=811)

| Variable                                             | Intervention group<br>(n=406) |       | Control group<br>(n=405) |       |
|------------------------------------------------------|-------------------------------|-------|--------------------------|-------|
| <b>Sociodemographics</b>                             | n                             | (%)   | n                        | (%)   |
| Family history of breast cancer                      |                               |       |                          |       |
| No close blood relative ever diagnosed               | 389                           | (96%) | 386                      | (95%) |
| One close blood relative diagnosed<br>aged ≥50 years | 17                            | (4%)  | 19                       | (5%)  |
| Country of birth                                     |                               |       |                          |       |
| Australia or New Zealand                             | 327                           | (81%) | 335                      | (83%) |
| Other                                                | 79                            | (19%) | 70                       | (17%) |
| Main language spoken at home                         |                               |       |                          |       |
| English                                              | 390                           | (96%) | 396                      | (98%) |
| Other                                                | 16                            | (4%)  | 9                        | (2%)  |
| Education                                            |                               |       |                          |       |
| School only or trade certificate                     | 226                           | (56%) | 225                      | (56%) |
| Diploma or university degree or higher               | 180                           | (44%) | 180                      | (44%) |
| Marital status                                       |                               |       |                          |       |
| Married or living with a partner                     | 317                           | (78%) | 333                      | (82%) |
| Not currently living with a partner                  | 89                            | (22%) | 72                       | (18%) |
| Parent status                                        |                               |       |                          |       |
| Has one or more children                             | 361                           | (89%) | 363                      | (90%) |
| No children                                          | 45                            | (11%) | 42                       | (10%) |
| Work status                                          |                               |       |                          |       |
| Working full time or part time                       | 333                           | (82%) | 341                      | (84%) |
| No paid job currently                                | 73                            | (18%) | 64                       | (16%) |
| Age                                                  |                               |       |                          |       |
| 48-49 years old                                      | 289                           | (71%) | 294                      | (73%) |
| 50 years old                                         | 117                           | (29%) | 111                      | (27%) |
| <b>Decision-making variables</b>                     | Mean                          | (SD)  | Mean                     | (SD)  |
| Stage of decision making about screening             | 3.4                           | (1.0) | 3.4                      | (0.9) |
| Knowledge (basic concepts of screening)              | 4.4                           | (0.8) | 4.4                      | (0.8) |
| Attitudes towards having breast screening            | 26.5                          | (3.6) | 26.8                     | (3.6) |
| Intentions about having breast screening             | 4.5                           | (0.8) | 4.6                      | (0.8) |

*Note.* Baseline variables were included as covariates in the mediation analysis. Sociodemographic factors were dichotomised as shown. Possible ranges for decision-making variables: Stage of decision making 1 (not yet thought about the options) to 4 (already made a choice), Knowledge 0 to 5, Attitudes 6 to 30, Intentions 1 to 5.

Table 2 presents mean post-intervention scores for intervention and control groups on the variables included in the mediation model. Compared with controls, the intervention group showed greater knowledge about overdetected, lower worry about breast cancer, less positive attitudes towards breast screening, lower anticipated regret for not screening (versus for screening), and lower intentions to undergo screening.

Table 2. Means and standard deviations for study groups on screening intentions and mediator variables

| Variable                | Intervention group<br>(n=406) | Control group<br>(n=405) | p value |
|-------------------------|-------------------------------|--------------------------|---------|
| Overdetection knowledge | 6.2 (2.2)                     | 4.0 (1.6)                | <.001   |
| Breast cancer worry     | 1.7 (0.7)                     | 1.8 (0.7)                | <.001   |
| Screening attitudes     | 24.5 (4.4)                    | 26.1 (4.1)               | <.001   |
| Anticipated regret      | 1.9 (1.7)                     | 2.5 (1.6)                | <.001   |
| Screening intentions    | 4.1 (1.1)                     | 4.5 (0.9)                | <.001   |

Note. Possible score ranges were as follows: Overdetection knowledge 0 to 10, Breast cancer worry 1 to 4, Attitudes 6 to 30, Anticipated regret -4 to 4, Intentions 1 to 5. Groups were compared using t tests.

Serial mediation analysis found that the total indirect effect of the intervention on intentions was statistically significant, indicating that the intervention influenced intentions indirectly through its effects on the combined set of mediators. Reading the intervention rather than the control decision aid was associated with a decrease in screening intentions as a result of all specific indirect causal sequences in the model (Table 3). As the direct effect was not significant, there was no evidence that the intervention affected intentions independently of its influence on the mediators modelled.

Table 3 presents effect estimates and 95% CIs for the 15 specific indirect effects representing causal pathways through the various mediator sequences. The specific path coefficients are shown in Figure 1.

The main significant indirect effects of the intervention on intentions were those involving knowledge and attitudes as mediators, both separately (IE1, IE13 in Table 3) and together in sequence (IE3). The first specific indirect effect (IE1) tested whether overdetected knowledge mediated the relationship between the decision aid received and subsequent breast screening intentions; this effect was significant. Relative to those assigned to the control decision aid, participants receiving the intervention demonstrated better knowledge about overdetected and consequently expressed lower intentions to have screening. Another significant effect, IE13 showed

that the intervention resulted in less positive attitudes, which also led to lower screening intentions. IE3 tested the causal chain: intervention -> knowledge -> attitudes -> intentions. This was also significant and demonstrated that participants exposed to the intervention gained better overdetection knowledge, those with better knowledge had less positive attitudes, and these attitudes were in turn associated with reduced intentions to screen. Pair-wise contrasts revealed that the three largest specific indirect effects (IE1, IE3, and IE13) did not significantly differ in size.

Table 3. Direct and indirect effects of the intervention on screening intentions via four sequential mediators

| Path                                               | Effect        | SE           | 95% CI        |               |
|----------------------------------------------------|---------------|--------------|---------------|---------------|
| <b>Total effect</b>                                | <b>-.2768</b> | <b>.0540</b> | <b>-.3828</b> | <b>-.1708</b> |
| Direct effect                                      | -.0192        | .0501        | -.1175        | .0791         |
| <b>Total indirect effect</b>                       | <b>-.2576</b> | <b>.0449</b> | <b>-.3488</b> | <b>-.1734</b> |
| Specific indirect effects (IEs)                    |               |              |               |               |
| <b>1. Knowledge</b>                                | <b>-.0731</b> | <b>.0267</b> | <b>-.1281</b> | <b>-.0230</b> |
| 2. Knowledge, worry                                | -.0010        | .0017        | -.0073        | .0007         |
| <b>3. Knowledge, attitudes</b>                     | <b>-.0700</b> | <b>.0171</b> | <b>-.1071</b> | <b>-.0396</b> |
| <b>4. Knowledge, anticipated regret</b>            | <b>-.0201</b> | <b>.0072</b> | <b>-.0375</b> | <b>-.0088</b> |
| 5. Knowledge, worry, attitudes                     | -.0001        | .0007        | -.0023        | .0011         |
| 6. Knowledge, worry, anticipated regret            | -.0004        | .0005        | -.0021        | .0002         |
| <b>7. Knowledge, attitudes, anticipated regret</b> | <b>-.0121</b> | <b>.0040</b> | <b>-.0220</b> | <b>-.0059</b> |
| 8. Knowledge, worry, attitudes, anticipated regret | -.0000        | .0001        | -.0004        | .0021         |
| 9. Worry                                           | -.0047        | .0050        | -.0191        | .0021         |
| 10. Worry, attitudes                               | -.0003        | .0027        | -.0063        | .0046         |
| <b>11. Worry, anticipated regret</b>               | <b>-.0020</b> | <b>.0014</b> | <b>-.0063</b> | <b>-.0003</b> |
| 12. Worry, attitudes, anticipated regret           | -.0001        | .0005        | -.0012        | .0008         |
| <b>13. Attitudes</b>                               | <b>-.0618</b> | <b>.0285</b> | <b>-.1178</b> | <b>-.0065</b> |
| <b>14. Attitudes, anticipated regret</b>           | <b>-.0106</b> | <b>.0056</b> | <b>-.0241</b> | <b>-.0016</b> |
| 15. Anticipated regret                             | -.0012        | .0104        | -.0216        | .0200         |

Note.  $n = 811$ ; 50,000 bootstrap samples; bias-corrected confidence intervals. The four sequential mediators are overdetection knowledge, breast cancer worry, screening attitudes, and anticipated regret. Bold effects are significant ( $p < .05$ ).

The anticipated regret variable was also involved in several significant mediation pathways, influenced by knowledge and attitudes separately (IE4, IE14) and together (IE7). The most complex

1  
2  
3 of the significant indirect effects was IE7 leading from the intervention -> overdetection knowledge -  
4 > screening attitude -> anticipated regret -> screening intention. Compared with the control group,  
5 women receiving the intervention had greater overdetection knowledge, which led to less positive  
6 attitudes (as above); these were in turn associated with lower anticipated regret for not screening  
7 (versus screening), which translated into reduced intentions to screen.  
8  
9

10  
11 The specific indirect effect for the pathway through the complete causal chain involving all four  
12 mediators in sequence (IE8) – that is, adding breast cancer worry to the mediators discussed above –  
13 was not significant. Worry was part of only one significant indirect effect (IE11). The intervention  
14 reduced breast cancer worry; women with lower worry had lower anticipated regret for not  
15 screening, which again reduced screening intentions.  
16  
17  
18  
19

## 20 21 **DISCUSSION**

22  
23 This study showed that the relationship between exposure to information on overdetection and  
24 women's subsequent breast screening intentions was mediated by multiple cognitive and affective  
25 pathways. The intervention decision aid substantially improved understanding of overdetection, and  
26 it influenced – both directly and indirectly via its effect on knowledge – women's attitudes towards  
27 having screening. The mediation analysis revealed that these mechanisms involving knowledge and  
28 attitudes were particularly important in determining intentions about screening participation.  
29 Anticipated regret played a role in several additional pathways linking knowledge, attitudes and  
30 intentions. As women became more knowledgeable about overdetection and their screening  
31 attitudes became less positive, this lessened their expectation that *not* screening would cause regret  
32 and increased the realisation that *screening* might cause regret, which in turn influenced intentions.  
33  
34  
35  
36  
37  
38  
39

40 The randomised controlled trial design is a key strength of this study. Random allocation between  
41 two decision aids, differing only in the presence or absence of information about overdetection,  
42 enabled a rigorous test of the specific effects of this information when described in the context of  
43 other screening outcomes. Our serial mediation model controlled for a comprehensive set of  
44 baseline variables and examined plausible, theory-driven cause-effect relationships between  
45 exposure to the intervention and subsequently measured variables. Nonetheless, given the cross-  
46 sectional nature of the outcome and mediator data, we cannot definitively establish the causal  
47 ordering of these variables.  
48  
49  
50  
51  
52

53 Although previous literature has reported on screening decisions aided by decision support  
54 techniques,[26, 27] little work to date has examined mechanisms for *how* information provided in  
55 such resources translates into decisions. Our mediation findings are in line with the explanatory  
56  
57  
58  
59  
60

1  
2  
3 account of health decisions offered by the theory of planned behaviour.[24, 25] Under this theory,  
4 attitudes towards a behaviour are determined by salient beliefs about its consequences (in this case,  
5 the understanding conveyed by the decision aid that overdetection is a possible consequence of  
6 screening); these attitudes in turn determine intentions. Our observed mediation effects involving  
7 anticipated regret accord with other empirical evidence supporting its usefulness as an extension to  
8 the theory of planned behaviour.[28] Worry about the threat of breast cancer, though emphasised  
9 by other health psychology theories, did not appear to play a major role in determining screening  
10 intentions among our study participants. Utilising a theoretical basis in behavioural psychology or  
11 decision making theory is often overlooked but may strengthen the design and evaluation of  
12 decision support materials, although operationalizing such theories can be challenging.[29]

## 19 CONCLUSIONS

20  
21  
22 We have previously shown that giving women evidence-based written information about  
23 overdetection in breast screening can change women's screening intentions. Importantly, for the  
24 first time we now provide evidence, using mediation analysis, of how this cognitive and affective  
25 process works: the decision aid intervention achieved substantial knowledge gains, and thereby  
26 influenced attitudes and intentions towards screening. Our findings underline the importance of  
27 providing good-quality information to women when they are invited to consider screening, using  
28 materials with the capacity to successfully impart new and relevant knowledge. Effective  
29 communication tools and decision support resources are especially needed against a background of  
30 widely documented unrealistic public expectations of screening.[30] Our findings are a reminder that  
31 information can be a powerful intervention, and that the development of information resources  
32 must be done properly with rigour and care.  
33  
34  
35  
36  
37  
38  
39  
40  
41  
42  
43  
44  
45  
46  
47  
48  
49  
50  
51  
52  
53  
54  
55  
56  
57  
58  
59  
60

## DECLARATIONS

### Ethics approval and consent to participate

This study was approved by The University of Sydney human research ethics committee (2012/1429). Participants gave informed consent to take part in the study.

### Patient consent for publication

Not applicable

### Availability of data and material

The datasets used and/or analysed during the current study are available from the corresponding author on reasonable request.

### Funding

This work was supported by the National Health and Medical Research Council of Australia through Project Grant number 1062389.

### Competing interests

All authors have completed the ICMJE uniform disclosure form at [www.icmje.org/coi\\_disclosure.pdf](http://www.icmje.org/coi_disclosure.pdf) and declare: financial support from the National Health and Medical Research Council of Australia for the submitted work; no financial relationships with any organisations that might have an interest in the submitted work in the previous three years; no other relationships or activities that could appear to have influenced the submitted work.

### Authors' contributions

All authors contributed to study design. KMCC, AB, JJ, NH, HD, and KMcG obtained funding. JH, KMCC, and JJ led development of the intervention and implementation of the trial. KMcG advised on the statistical analysis. JH performed the statistical analysis, produced the tables and figure, and drafted the manuscript. All authors contributed to data interpretation and critically reviewed the manuscript.

### Acknowledgements

We thank Hazel Thornton for her contribution to the research project over many years, and for helpful comments on an earlier draft of this manuscript.

## REFERENCES

- 1 Harvey S. The charge and the challenges of breast cancer screening. *J Womens Health (Larchmt)* 2014;23(Suppl 1):S1-2. doi: 10.1089/jwh.2014.1509
- 2 Elmore J. Breast cancer screening: balancing evidence with culture, politics, money, and media. In: Houssami N, Miglioretti D, eds. *Breast Cancer Screening: An Examination of Scientific Evidence*. Amsterdam: Elsevier 2016:1-27.
- 3 Welch HG, Black W. Overdiagnosis in cancer. *J Natl Cancer Inst* 2010;102:605-13. doi: 10.1093/jnci/djq099
- 4 Independent UK Panel on Breast Cancer Screening. The benefits and harms of breast cancer screening: an independent review. *Lancet* 2012;380:1778-86. doi: 10.1016/S0140-6736(12)61611-0
- 5 Jacklyn G, Glasziou P, Macaskill P, et al. Meta-analysis of breast cancer mortality benefit and overdiagnosis adjusted for adherence: improving information on the effects of attending screening mammography. *Br J Cancer* 2016;114:1269-76. doi: 10.1038/bjc.2016.90
- 6 Heath I. It is not wrong to say no. *BMJ* 2009;338:b2529. doi: 10.1136/bmj.b2529
- 7 Kirwan C. Breast cancer screening: what does the future hold? *BMJ* 2013;346:f87. doi: 10.1136/bmj.f87
- 8 Stefanek M. Uninformed compliance or informed choice? A needed shift in our approach to cancer screening. *J Natl Cancer Inst* 2011;103:1821-26. doi: 10.1093/jnci/djr474
- 9 Gummersbach E, Piccoliori G, Oriol Zerbe C, et al. Are women getting relevant information about mammography screening for an informed consent: a critical appraisal of information brochures used for screening invitation in Germany, Italy, Spain and France. *Eur J Public Health* 2010;20:409-14. doi: 10.1093/eurpub/ckp174
- 10 Jorgensen K, Gotzsche P. Content of invitations for publicly funded screening mammography. *BMJ* 2006;332:538-41. doi: 10.1136/bmj.332.7540.538
- 11 Zapka J, Geller B, Bulliard J, et al. Print information to inform decisions about mammography screening participation in 16 countries with population-based programs. *Patient Educ Couns* 2006;63:126-37. doi: 10.1016/j.pec.2005.09.012
- 12 Welch HG, Passow H. Quantifying the benefits and harms of screening mammography. *JAMA Intern Med* 2014;174:448-54. doi: 10.1001/jamainternmed.2013.13635
- 13 Loberg M, Lousdal ML, Bretthauer M, et al. Benefits and harms of mammography screening. *Breast Cancer Res* 2015;17:63. doi: 10.1186/s13058-015-0525-z
- 14 Biller-Andorno N, Juni P. Abolishing mammography screening programs? A view from the Swiss Medical Board. *N Engl J Med* 2014;370:1965-67. doi: 10.1056/NEJMp1401875
- 15 Schwartz L, Woloshin S, Sox H, et al. US women's attitudes to false positive mammography results and detection of ductal carcinoma in situ: cross sectional survey. *BMJ* 2000;320:1635-40. doi: 10.1136/bmj.320.7250.1635
- 16 Hersch J, Barratt A, Jansen J, et al. Use of a decision aid including information on overdiagnosis to support informed choice about breast cancer screening: a randomised controlled trial. *Lancet* 2015;385:1642-52. doi: 10.1016/S0140-6736(15)60123-4
- 17 Hersch J, Jansen J, Barratt A, et al. Overdiagnosis in breast cancer screening: development and preliminary evaluation of a decision aid. *BMJ Open* 2014;4:e006016. doi: 10.1136/bmjopen-2014-006016
- 18 Armitage C, Conner M. Social cognition models and health behaviour: a structured review. *Psychol Health* 2000;15:173-89. doi: 10.1080/08870440008400299
- 19 Hayes A. *Introduction to Mediation, Moderation, and Conditional Process Analysis: A Regression-based Approach*. New York: Guilford 2013.
- 20 Hersch J, Barratt A, Jansen J, et al. The effect of information about overdiagnosis of breast cancer on women's decision-making about mammography screening: study protocol for a randomised controlled trial. *BMJ Open* 2014;4:e004990. doi: 10.1136/bmjopen-2014-004990

- 1  
2  
3 21 Dormandy E, Michie S, Hooper R, et al. Informed choice in antenatal Down syndrome screening: a  
4 cluster-randomised trial of combined versus separate visit testing. *Patient Educ Couns*  
5 2006;61:56-64. doi: 10.1016/j.pec.2005.02.006  
6  
7 22 Sandberg T, Hutter R, Richetin J, et al. Testing the role of action and inaction anticipated regret on  
8 intentions and behaviour. *Br J Soc Psychol* 2016;55:407-25. doi: 10.1111/bjso.12141  
9  
10 23 Sivell S, Elwyn G, Edwards A, et al. Factors influencing the surgery intentions and choices of  
11 women with early breast cancer: the predictive utility of an extended theory of planned  
12 behaviour. *BMC Med Inform Decis Mak* 2013;13:92. doi: 10.1186/1472-6947-13-92  
13  
14 24 Ajzen I. The theory of planned behavior. *Organ Behav Hum Decis Process* 1991;50:179-211. doi:  
15 10.1016/0749-5978%2891%2990020-T  
16  
17 25 Ajzen I. Martin Fishbein's legacy: the reasoned action approach. *Ann Am Acad Pol Soc Sci*  
18 2012;640:11-27. doi: 10.1177/0002716211423363  
19  
20 26 Biesecker B, Schwartz M, Marteau T. Enhancing informed choice to undergo health screening: a  
21 systematic review. *Am J Health Behav* 2013;37:351-59. doi: 10.5993/AJHB.37.3.8  
22  
23 27 van Agt H, Korfage I, Essink-Bot M. Interventions to enhance informed choices among invitees of  
24 screening programmes – a systematic review. *Eur J Public Health* 2014;24:789-801. doi:  
25 10.1093/eurpub/ckt205  
26  
27 28 Sandberg T, Conner M. Anticipated regret as an additional predictor in the theory of planned  
28 behaviour: a meta-analysis. *Br J Soc Psychol* 2008;47:589-606. doi: 10.1348/014466607X258704  
29  
30 29 Elwyn G, Stiel M, Durand MA, et al. The design of patient decision support interventions:  
31 addressing the theory-practice gap. *J Eval Clin Pract* 2011;17:565-74. doi: 10.1111/j.1365-  
32 2753.2010.01517.x  
33  
34 30 Hoffmann T, Del Mar C. Patients' expectations of the benefits and harms of treatments,  
35 screening, and tests: a systematic review. *JAMA Intern Med* 2015;175:274-86. doi:  
36 10.1001/jamainternmed.2014.6016  
37  
38  
39  
40  
41  
42  
43  
44  
45  
46  
47  
48  
49  
50  
51  
52  
53  
54  
55  
56  
57  
58  
59  
60

## FIGURES

Fig. 1. Title: Multiple mediation model of decision aid effects on breast screening intentions via four sequential mediators

Fig. 1. Legend: Graphic representation of the serial multiple mediation model of decision aid effects on breast screening intentions via four sequential mediators (overdetection knowledge, breast cancer worry, screening attitudes, and anticipated regret). The intervention was hypothesised to exert an effect on screening intentions through the four mediators in sequence. Outcome and mediator variables were standardised prior to analysis. Bold coefficients are significant ( $p < .05$ ). Analyses controlled for baseline measures including screening intentions and attitudes, basic screening knowledge, stage of decision making, breast cancer family history, birthplace, main language spoken, education, marital status, parent status, work status, and age.



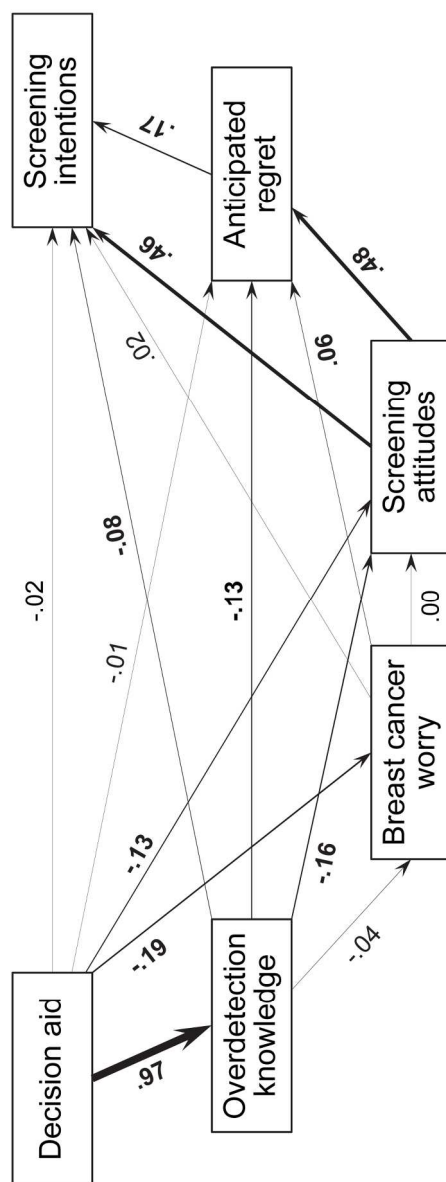

Multiple mediation model of decision aid effects on breast screening intentions via four sequential mediators

Graphic representation of the serial multiple mediation model of decision aid effects on breast screening intentions via four sequential mediators (overdetection knowledge, breast cancer worry, screening attitudes, and anticipated regret). The intervention was hypothesised to exert an effect on screening intentions through the four mediators in sequence. Outcome and mediator variables were standardised prior to analysis. Bold coefficients are significant ( $p < .05$ ). Analyses controlled for baseline measures including screening intentions and attitudes, basic screening knowledge, stage of decision making, breast cancer family history, birthplace, main language spoken, education, marital status, parent status, work status, and age.

87x225mm (300 x 300 DPI)

1  
2  
3  
4  
5  
6  
7  
8  
9  
10  
11  
12  
13  
14  
15  
16  
17  
18  
19  
20  
21  
22  
23  
24  
25  
26  
27  
28  
29  
30  
31  
32  
33  
34  
35  
36  
37  
38  
39  
40  
41  
42  
43  
44  
45  
46  
47  
48  
49  
50  
51  
52  
53  
54  
55  
56  
57  
58  
59  
60

For peer review only

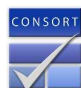

## CONSORT 2010 checklist of information to include when reporting a randomised trial\*

| Section/Topic             | Item No | Checklist item                                                                                                                        | Reported on page No       |
|---------------------------|---------|---------------------------------------------------------------------------------------------------------------------------------------|---------------------------|
| <b>Title and abstract</b> |         |                                                                                                                                       |                           |
|                           | 1a      | Identification as a randomised trial in the title                                                                                     | 1                         |
|                           | 1b      | Structured summary of trial design, methods, results, and conclusions (for specific guidance see CONSORT for abstracts)               | 2                         |
| <b>Introduction</b>       |         |                                                                                                                                       |                           |
| Background and objectives | 2a      | Scientific background and explanation of rationale                                                                                    | 4                         |
|                           | 2b      | Specific objectives or hypotheses                                                                                                     | 5                         |
| <b>Methods</b>            |         |                                                                                                                                       |                           |
| Trial design              | 3a      | Description of trial design (such as parallel, factorial) including allocation ratio                                                  | 5 + protocol[1]           |
|                           | 3b      | Important changes to methods after trial commencement (such as eligibility criteria), with reasons                                    | n/a                       |
| Participants              | 4a      | Eligibility criteria for participants                                                                                                 | 5 + protocol[1]           |
|                           | 4b      | Settings and locations where the data were collected                                                                                  | 5                         |
| Interventions             | 5       | The interventions for each group with sufficient details to allow replication, including how and when they were actually administered | 5 + published protocol[1] |
| Outcomes                  | 6a      | Completely defined pre-specified primary and secondary outcome measures, including how and when they were assessed                    | 5-6 + protocol[1]         |
|                           | 6b      | Any changes to trial outcomes after the trial commenced, with reasons                                                                 | n/a                       |
| Sample size               | 7a      | How sample size was determined                                                                                                        | Protocol[1]               |

|                                                      |     |                                                                                                                                                                                             |                 |
|------------------------------------------------------|-----|---------------------------------------------------------------------------------------------------------------------------------------------------------------------------------------------|-----------------|
|                                                      | 7b  | When applicable, explanation of any interim analyses and stopping guidelines                                                                                                                | n/a             |
| <b>Randomisation:</b>                                |     |                                                                                                                                                                                             |                 |
| Sequence generation                                  | 8a  | Method used to generate the random allocation sequence                                                                                                                                      | Lancet[2]       |
|                                                      | 8b  | Type of randomisation; details of any restriction (such as blocking and block size)                                                                                                         | Protocol[1]     |
| Allocation concealment mechanism                     | 9   | Mechanism used to implement the random allocation sequence (such as sequentially numbered containers), describing any steps taken to conceal the sequence until interventions were assigned | 5               |
| Implementation                                       | 10  | Who generated the random allocation sequence, who enrolled participants, and who assigned participants to interventions                                                                     | 5 + protocol[1] |
| Blinding                                             | 11a | If done, who was blinded after assignment to interventions (for example, participants, care providers, those assessing outcomes) and how                                                    | 5               |
|                                                      | 11b | If relevant, description of the similarity of interventions                                                                                                                                 | 5               |
| Statistical methods                                  | 12a | Statistical methods used to compare groups for primary and secondary outcomes                                                                                                               | Lancet[2]       |
|                                                      | 12b | Methods for additional analyses, such as subgroup analyses and adjusted analyses                                                                                                            | 6               |
| <b>Results</b>                                       |     |                                                                                                                                                                                             |                 |
| Participant flow (a diagram is strongly recommended) | 13a | For each group, the numbers of participants who were randomly assigned, received intended treatment, and were analysed for the primary outcome                                              | 5, 7, Lancet[2] |
|                                                      | 13b | For each group, losses and exclusions after randomisation, together with reasons                                                                                                            | 6-7 + Lancet[2] |
| Recruitment                                          | 14a | Dates defining the periods of recruitment and follow-up                                                                                                                                     | Lancet[2]       |
|                                                      | 14b | Why the trial ended or was stopped                                                                                                                                                          | n/a             |
| Baseline data                                        | 15  | A table showing baseline demographic and clinical characteristics for each group                                                                                                            | 7               |

|                          |     |                                                                                                                                                   |                    |
|--------------------------|-----|---------------------------------------------------------------------------------------------------------------------------------------------------|--------------------|
| Numbers analysed         | 16  | For each group, number of participants (denominator) included in each analysis and whether the analysis was by original assigned groups           | 6-7 +<br>Lancet[2] |
| Outcomes and estimation  | 17a | For each primary and secondary outcome, results for each group, and the estimated effect size and its precision (such as 95% confidence interval) | 8-9                |
|                          | 17b | For binary outcomes, presentation of both absolute and relative effect sizes is recommended                                                       | n/a                |
| Ancillary analyses       | 18  | Results of any other analyses performed, including subgroup analyses and adjusted analyses, distinguishing pre-specified from exploratory         | 9                  |
| Harms                    | 19  | All important harms or unintended effects in each group (for specific guidance see CONSORT for harms)                                             | n/a                |
| <b>Discussion</b>        |     |                                                                                                                                                   |                    |
| Limitations              | 20  | Trial limitations, addressing sources of potential bias, imprecision, and, if relevant, multiplicity of analyses                                  | 10                 |
| Generalisability         | 21  | Generalisability (external validity, applicability) of the trial findings                                                                         | 3                  |
| Interpretation           | 22  | Interpretation consistent with results, balancing benefits and harms, and considering other relevant evidence                                     | 10-11              |
| <b>Other information</b> |     |                                                                                                                                                   |                    |
| Registration             | 23  | Registration number and name of trial registry                                                                                                    | 2                  |
| Protocol                 | 24  | Where the full trial protocol can be accessed, if available                                                                                       | 13                 |
| Funding                  | 25  | Sources of funding and other support (such as supply of drugs), role of funders                                                                   | 12 + Lancet[2]     |

\*We strongly recommend reading this statement in conjunction with the CONSORT 2010 Explanation and Elaboration for important clarifications on all the items. If relevant, we also recommend reading CONSORT extensions for cluster randomised trials, non-inferiority and equivalence trials, non-pharmacological treatments, herbal interventions, and pragmatic trials. Additional extensions are forthcoming: for those and for up to date references relevant to this checklist, see [www.consort-statement.org](http://www.consort-statement.org).

1 Hersch J, Barratt A, Jansen J, et al. The effect of information about overdetection of breast cancer on women's decision-making about mammography screening: study protocol for a randomised controlled trial. *BMJ Open* 2014;4:e004990. doi: 10.1136/bmjopen-2014-004990

2 Hersch J, Barratt A, Jansen J, et al. Use of a decision aid including information on overdetection to support informed choice about breast cancer screening: a randomised controlled trial. *Lancet* 2015;385:1642-52. doi: 10.1016/S0140-6736(15)60123-4

# BMJ Open

## How information about overdiagnosis changes breast cancer screening decisions: a mediation analysis within a randomised controlled trial

|                                 |                                                                                                                                                                                                                                                                                                                                                                                                                                                                                                                                                                                                               |
|---------------------------------|---------------------------------------------------------------------------------------------------------------------------------------------------------------------------------------------------------------------------------------------------------------------------------------------------------------------------------------------------------------------------------------------------------------------------------------------------------------------------------------------------------------------------------------------------------------------------------------------------------------|
| Journal:                        | <i>BMJ Open</i>                                                                                                                                                                                                                                                                                                                                                                                                                                                                                                                                                                                               |
| Manuscript ID                   | bmjopen-2017-016246.R1                                                                                                                                                                                                                                                                                                                                                                                                                                                                                                                                                                                        |
| Article Type:                   | Research                                                                                                                                                                                                                                                                                                                                                                                                                                                                                                                                                                                                      |
| Date Submitted by the Author:   | 22-Jun-2017                                                                                                                                                                                                                                                                                                                                                                                                                                                                                                                                                                                                   |
| Complete List of Authors:       | Hersch, Jolyn; University of Sydney, School of Public Health<br>McGeechan, Kevin; University of Sydney, School of Public Health<br>Barratt, Alexandra; University of Sydney, School of Public Health<br>Jansen, Jesse; University of Sydney, School of Public Health<br>Irwig, Les; University of Sydney, School of Public Health<br>Jacklyn, Gemma; University of Sydney, School of Public Health<br>Houssami, Nehmat; University of Sydney, School of Public Health<br>Dhillon, Haryana; University of Sydney, Central Clinical School<br>McCaffery, Kirsten; University of Sydney, School of Public Health |
| <b>Primary Subject Heading</b>: | Communication                                                                                                                                                                                                                                                                                                                                                                                                                                                                                                                                                                                                 |
| Secondary Subject Heading:      | Public health                                                                                                                                                                                                                                                                                                                                                                                                                                                                                                                                                                                                 |
| Keywords:                       | Breast imaging < RADIOLOGY & IMAGING, Overdiagnosis, Decision aid, Informed decision making, Cancer screening, Mediation                                                                                                                                                                                                                                                                                                                                                                                                                                                                                      |
|                                 |                                                                                                                                                                                                                                                                                                                                                                                                                                                                                                                                                                                                               |

SCHOLARONE™  
Manuscripts

only

**TITLE**

How information about overdetection changes breast cancer screening decisions: a mediation analysis within a randomised controlled trial

**AUTHORS**

Jolyn Hersch<sup>1,2,3</sup>, jolyn.hersch@sydney.edu.au (corresponding author)

Kevin McGeechan<sup>1,2,3</sup>, kevin.mcgeechan@sydney.edu.au

Alexandra Barratt<sup>1,2,3</sup>, alexandra.barratt@sydney.edu.au

Jesse Jansen<sup>1,2,3</sup>, jesse.jansen@sydney.edu.au

Les Irwig<sup>1,2</sup>, les.irwig@sydney.edu.au

Gemma Jacklyn<sup>1,2</sup>, gemma.jacklyn@sydney.edu.au

Nehmat Houssami<sup>1,2</sup>, nehmat.houssami@sydney.edu.au

Haryana Dhillon<sup>3,4</sup>, haryana.dhillon@sydney.edu.au

Kirsten McCaffery<sup>1,2,3</sup>, kirsten.mccaffery@sydney.edu.au

**AFFILIATIONS**

<sup>1</sup>School of Public Health, Sydney Medical School, The University of Sydney, Australia.

<sup>2</sup>Wiser Healthcare, The University of Sydney, Australia.

<sup>3</sup>Centre for Medical Psychology and Evidence-based Decision-making (CeMPED), The University of Sydney, Australia.

<sup>4</sup>Central Clinical School, Sydney Medical School, The University of Sydney, Australia.

**CORRESPONDING AUTHOR**

Jolyn Hersch

School of Public Health  
Edward Ford Building (A27)  
The University of Sydney  
NSW 2006  
AUSTRALIA

jolyn.hersch@sydney.edu.au

+612 9036 9042

**WORD COUNT**

2946

**ABSTRACT**

Objectives: In a randomised controlled trial, we found that informing women about overdetected changed their breast screening decisions. We now present a mediation analysis aimed at exploring the pathways through which study participants who received the intervention processed information about overdetected and integrated it into their decision making. We examined a series of potential mediators of the relationship between exposure to this information and subsequent breast screening intentions.

Design: Serial multiple mediation analysis within a randomised controlled trial

Setting: New South Wales, Australia

Participants: 811 women aged 48–50 years with no personal history of breast cancer

Interventions: Two versions of a decision aid giving women information about breast cancer deaths averted and false positives from screening, either with (intervention) or without (control) information on overdetected.

Main outcome: Intentions to undergo breast screening in the next 2–3 years

Mediators: Knowledge about overdetected, worry about breast cancer, attitudes towards breast screening, and anticipated regret

Results: The effect of information about overdetected on women's breast screening intentions was mediated through multiple cognitive and affective pathways. In particular, the information led to substantial improvements in women's understanding of overdetected, and it influenced – both directly and indirectly via its effect on knowledge – their attitudes towards having screening. Mediation analysis showed that the mechanisms involving knowledge and attitudes were particularly important in determining intentions about screening participation.

Conclusions: Even in this emotive context, new information influenced women's decision making by changing their understanding of possible consequences of screening and their attitudes towards undergoing it. These findings emphasise the need to provide good-quality information on screening outcomes, and to communicate this information effectively, so that women can make well-informed decisions.

Trial registration: This study was prospectively registered with the Australian New Zealand Clinical Trials Registry (ACTRN12613001035718) on 17 September 2013.



**STRENGTHS AND LIMITATIONS OF THIS STUDY**

- Random allocation between two decision aids, differing only in the presence or absence of information about overdiagnosis, enabled a rigorous test of the specific effects of this information when described in the context of other screening outcomes.
- Participants were women entering the target age range for breast screening, who were sampled randomly from the general community and were facing real decisions.
- Our serial mediation model controlled for a comprehensive set of baseline variables and examined plausible, theory-driven cause–effect relationships between exposure to the intervention and subsequently measured variables.
- Nonetheless, given the cross-sectional nature of the outcome and mediator data, we cannot definitively establish the causal ordering of these variables.

**KEYWORDS**

Breast imaging

Overdiagnosis

Decision aid

Informed decision making

Cancer screening

Mediation

1  
2  
3 Breast cancer screening is a complex and emotionally charged issue,[1] a topic surrounded by what  
4 has been described as a perfect storm of politics and science.[2] While screening can reduce deaths  
5 from breast cancer, it can also cause harm through the counterintuitive phenomenon of  
6 overdiagnosis. The term overdiagnosis is increasingly accepted in the specific  
7 context of screening to distinguish it from overdiagnosis that occurs via other mechanisms, such as  
8 broadening disease definitions. An overdiagnosed breast cancer is one found by screening, and  
9 consequently treated, that would not have caused any health problems had it been left undetected  
10 and untreated.[3] Without screening, such a cancer would never have been diagnosed.  
11 Overdiagnosed cancers are 'real' cancers in the sense that they meet current pathological criteria for  
12 cancer diagnosis, but finding and treating them does not improve health outcomes. Such a diagnosis  
13 and the resulting treatment can cause serious lifelong harm, and overdiagnosis is therefore  
14 considered the major downside to breast screening.

15  
16 Mounting evidence of the extent of overdiagnosis (estimated as 19% of breast cancers diagnosed in  
17 women invited to screen from age 50 to 69 [4] and 30% for those who attend screening [5]) has led  
18 to recognition that the benefits and harms of breast screening are finely balanced for women at  
19 population-level risk of breast cancer. The risk of overdiagnosis and its consequences must be  
20 weighed against the benefit of reducing breast cancer mortality (relative risk reduction estimated as  
21 20% for women invited to screen from age 50 to 69 [4] and 30% for those screened [5]). Experts  
22 familiar with the evidence now acknowledge that individual women may perceive the harm-benefit  
23 trade-off differently depending on their personal context and preferences – some will opt for  
24 screening while others decline, and either choice may be appropriate if it represents an informed  
25 decision.[6-8] Throughout the history of breast screening, however, women invited to participate  
26 have not been given all the relevant information.[9-11] Consensus is growing that information on  
27 screening benefits and harms, including overdiagnosis, must be communicated clearly and  
28 transparently to women offered screening so that they can make informed decisions about whether  
29 to be screened.[4, 12, 13] This is all the more important because of evidence that women hold  
30 misconceptions about breast screening and its effects.[14, 15]

31  
32 Against the background of this recommended shift in communication, the issue of how information  
33 about overdiagnosis affects women and their screening decisions is critical. In a randomised trial we  
34 addressed this question in women approaching the recommended age for starting mammography  
35 screening (age 50, when women are invited for screening in many countries including Australia).[16]  
36 We sent women one of two versions of a decision aid (evidence-based information booklet) giving  
37 information about breast cancer deaths averted and false positives from screening (abnormal  
38  
39  
40  
41  
42  
43  
44  
45  
46  
47  
48  
49  
50  
51  
52  
53  
54  
55  
56  
57  
58  
59  
60

1  
2  
3 mammograms in women without cancer), either with or without information on overdetected.[17]  
4 The intervention produced several significant effects on decision making.[16] The additional  
5 overdetected information improved knowledge, increased the number of women making an  
6 informed choice about screening (primary outcome of the trial), and also reduced positive attitudes  
7 to screening and the number of women intending to be screened.[16]  
8  
9

10  
11 From our study design – chosen to identify the specific impact of information about overdetected –  
12 it appears that communicating this information influenced women’s assessment of the value of  
13 screening to them, leading to lower intentions to be screened within the intervention group. This  
14 finding has never been observed before, and raises important questions. To facilitate the translation  
15 of intervention research findings into other contexts, it is recommended to test hypothesised causal  
16 mechanisms.[18] However, causal processes leading from the use of decision aids to the decisions  
17 subsequently made are not well understood, as few studies have addressed questions about how  
18 these interventions achieve their effects.[19] Only recently have decision aid developers started to  
19 critically examine in detail how behavioural, cognitive and social theories of decision making could  
20 inform the design and evaluation of decision support interventions.[20] In this paper we explore the  
21 psychological pathways through which study participants processed overdetected information and  
22 integrated it into their decision making. We provide an explanatory account incorporating cognitive  
23 and affective pathways, using psychological theories [21] and mediation analysis.[22]  
24  
25  
26  
27  
28  
29  
30  
31  
32

### 33 **METHODS**

34  
35  
36 We did a parallel-group randomised controlled trial with women aged 48-50 years, recruited from  
37 the general community in New South Wales, Australia. The trial is described in detail elsewhere.[16,  
38 23] Trained interviewers from an independent non-profit company recruited participants via  
39 telephone. Women were eligible if they had not undergone mammography in the past 2 years and  
40 did not have a personal or strong family history of breast cancer. Participants knew they would  
41 receive one of two versions of a breast screening information booklet but did not know how these  
42 differed or which was the intervention.  
43  
44  
45  
46  
47

48  
49 We collected sociodemographics and baseline data on women’s stage of decision making (how far  
50 along they were with their decision about breast screening), basic conceptual knowledge, attitudes,  
51 and intentions (Table 1).[16, 23] We then randomly assigned 879 women to the intervention (n=440)  
52 or control group (n=439) and sent their allocated decision aid by post. A programmer who had no  
53 contact with participants generated the randomisation sequence, which was inaccessible until after  
54 recruitment, ensuring allocation concealment.  
55  
56  
57  
58  
59  
60

1  
2  
3 The intervention decision aid contained evidence-based explanatory and quantitative information  
4 about important outcomes of undergoing screening biennially from age 50 to 69 years (breast  
5 cancer mortality reduction, overdetected, and false positives) compared with not screening over  
6 this period. The control decision aid omitted all overdetected content but was otherwise identical to  
7 the intervention. The decision aids were short booklets combining text and visual formats, and are  
8 published.[16, 17]  
9  
10

11  
12  
13 Our purpose in the analysis reported here was to explore causal pathways between exposure to  
14 information about overdetected in a decision aid (intervention) and subsequent breast screening  
15 intentions (outcome). We examined a series of potential mediators of this relationship: knowledge  
16 about overdetected, worry about breast cancer, attitudes towards breast screening, and anticipated  
17 regret. We collected follow-up data for these variables using standardised questions in a structured  
18 post-intervention telephone interview, 1-4 weeks after randomisation. The participant's group  
19 assignment was unknown to the interviewer until the end of the interview.  
20  
21  
22  
23  
24

25  
26 Our post-intervention knowledge scale assessed conceptual understanding of three key screening  
27 outcomes (breast cancer mortality reduction, overdetected, and false positives) and awareness of  
28 the approximate numbers affected.[16] For the mediation analysis we used the overdetected  
29 knowledge subscale (scored 0 to 10, including conceptual and numeric components) as conveying  
30 this new information was the main aim of the intervention. We assessed attitudes to breast  
31 screening via a widely used 6-item instrument (possible range 6 to 30), intentions to undergo  
32 screening in the next 2-3 years (1 item, 5-point response scale from *definitely* to *definitely not*), and  
33 worry about developing breast cancer (1 item, 4-point scale).[16, 23, 24] Higher scores on these  
34 measures reflect better knowledge, more positive attitudes and intentions, and greater worry,  
35 respectively. We collected women's anticipated regret both for screening (anticipating that if she  
36 undergoes screening (action) she may later wish she had not) and *not* screening (anticipating that if  
37 she does not undergo screening (inaction) she may later wish she had).[25] We then calculated a  
38 differential anticipated regret score [26] by subtracting the action from the inaction score. Higher  
39 scores on the resulting measure (possible range -4 to 4) reflect greater anticipated regret for *not*  
40 screening, adjusted for the woman's anticipated regret for screening. See the Appendix for further  
41 details about these measures.  
42  
43  
44  
45  
46  
47  
48  
49  
50  
51

52 We tested whether these variables functioned in a chain with a specified direction of causal flow  
53 (serial mediation).[22] Based on health psychology theories (e.g., theory of planned behaviour [27,  
54 28]) we tested the following causal chain: intervention (group allocation) -> overdetected  
55 knowledge -> worry -> attitudes -> anticipated regret -> intentions. One could hypothesise, for  
56  
57  
58  
59  
60

1  
2  
3 example, that exposure to information (if communicated effectively) should increase knowledge  
4 about overdetection. Understanding that some breast cancers would not cause harm even if  
5 untreated might reduce worry about breast cancer, which may affect attitudes towards screening.  
6 Anticipation of feeling regret if one does not (vs does) undergo screening might depend on attitudes  
7 and in turn influence intentions.  
8  
9

10  
11 Mediation models were tested using model 6 in the PROCESS macro (Version 2.16) for SPSS (Version  
12 24).[22] This procedure applies an ordinary least squares path analytic framework to estimate both  
13 direct and indirect effects of the intervention on screening intentions. To derive these effects,  
14 PROCESS fits a series of linear regression models with each variable treated as the outcome in turn.  
15 The regression coefficients estimate how each variable affects other variables later in the sequence.  
16 Baseline variables in Table 1 (all measured pre-intervention, including baseline screening intentions)  
17 were statistically controlled by including them as covariates during mediation analyses. Outcome  
18 and mediator variables were standardised (expressed in units of standard deviations from the  
19 sample mean) for the mediation analysis. We used a bootstrapping procedure in order to conduct  
20 inference tests for the indirect effects. This involved repeatedly drawing samples (with replacement)  
21 of size  $n$  (where  $n$  equals the original sample size) from the existing data, and then estimating the  
22 indirect effect in each resampled dataset. By repeating this process thousands of times, PROCESS  
23 generated an empirical approximation of the underlying sampling distribution of the indirect effect  
24 which was then used to construct a confidence interval for the effect. In this study, 50,000 bootstrap  
25 samples were used to create 95% bias-corrected confidence intervals (95% CIs) for the indirect  
26 effects (IEs), which we considered significant if the CI did not include zero.  
27  
28  
29  
30  
31  
32  
33  
34  
35  
36  
37

## 38 RESULTS

39  
40 Of 879 participants randomised, 838 completed the follow-up interview. Among these, 27 did not  
41 answer all relevant questions and were excluded from the mediation analysis. Sociodemographic  
42 characteristics were similar for randomised participants who were and were not included in the  
43 mediation analysis. Table 1 shows baseline characteristics of the 811 included participants, which  
44 were well balanced between the intervention and control groups.  
45  
46  
47  
48

49  
50 Table 2 presents mean post-intervention scores for intervention and control groups on the variables  
51 included in the mediation model. Compared with controls, the intervention group showed greater  
52 knowledge about overdetection, lower worry about breast cancer, less positive attitudes towards  
53 breast screening, lower anticipated regret for not screening (versus for screening), and lower  
54 intentions to undergo screening. Correlations between these variables were significant ( $p < .001$ ).  
55  
56  
57  
58  
59  
60

Table 1. Baseline sample characteristics (n=811)

| Variable                                             | Intervention group<br>(n=406) |             | Control group<br>(n=405) |             |
|------------------------------------------------------|-------------------------------|-------------|--------------------------|-------------|
| <b>Sociodemographics</b>                             | n                             | (%)         | n                        | (%)         |
| Family history of breast cancer                      |                               |             |                          |             |
| No close blood relative ever diagnosed               | 389                           | (96%)       | 386                      | (95%)       |
| One close blood relative diagnosed<br>aged ≥50 years | 17                            | (4%)        | 19                       | (5%)        |
| Country of birth                                     |                               |             |                          |             |
| Australia or New Zealand                             | 327                           | (81%)       | 335                      | (83%)       |
| Other                                                | 79                            | (19%)       | 70                       | (17%)       |
| Main language spoken at home                         |                               |             |                          |             |
| English                                              | 390                           | (96%)       | 396                      | (98%)       |
| Other                                                | 16                            | (4%)        | 9                        | (2%)        |
| Education                                            |                               |             |                          |             |
| School only or trade certificate                     | 226                           | (56%)       | 225                      | (56%)       |
| Diploma or university degree or higher               | 180                           | (44%)       | 180                      | (44%)       |
| Marital status                                       |                               |             |                          |             |
| Married or living with a partner                     | 317                           | (78%)       | 333                      | (82%)       |
| Not currently living with a partner                  | 89                            | (22%)       | 72                       | (18%)       |
| Parent status                                        |                               |             |                          |             |
| Has one or more children                             | 361                           | (89%)       | 363                      | (90%)       |
| No children                                          | 45                            | (11%)       | 42                       | (10%)       |
| Work status                                          |                               |             |                          |             |
| Working full time or part time                       | 333                           | (82%)       | 341                      | (84%)       |
| No paid job currently                                | 73                            | (18%)       | 64                       | (16%)       |
| Age                                                  |                               |             |                          |             |
| 48-49 years old                                      | 289                           | (71%)       | 294                      | (73%)       |
| 50 years old                                         | 117                           | (29%)       | 111                      | (27%)       |
| <b>Pre-intervention measures</b>                     | <b>Mean</b>                   | <b>(SD)</b> | <b>Mean</b>              | <b>(SD)</b> |
| Stage of decision making about screening             | 3.4                           | (1.0)       | 3.4                      | (0.9)       |
| Knowledge (basic concepts of screening)              | 4.4                           | (0.8)       | 4.4                      | (0.8)       |
| Baseline attitudes to breast screening               | 26.5                          | (3.6)       | 26.8                     | (3.6)       |
| Baseline intentions about screening                  | 4.5                           | (0.8)       | 4.6                      | (0.8)       |

*Note.* All baseline variables appearing above were included as covariates in the mediation analysis (sociodemographic factors were dichotomised as shown). Possible ranges: Stage of decision making 1 (not yet thought about the options) to 4 (already made a choice), Knowledge 0 (none correct) to 5 (all correct), Attitudes 6 (least positive) to 30 (most positive), Intentions 1 (definitely not) to 5 (definitely).

Table 2. Means and standard deviations for study groups on screening intentions and mediator variables

| Variable                | Intervention group<br>(n=406) | Control group<br>(n=405) | p value |
|-------------------------|-------------------------------|--------------------------|---------|
| Overdetection knowledge | 6.2 (2.2)                     | 4.0 (1.6)                | <.001   |
| Breast cancer worry     | 1.7 (0.7)                     | 1.8 (0.7)                | <.001   |
| Screening attitudes     | 24.5 (4.4)                    | 26.1 (4.1)               | <.001   |
| Anticipated regret      | 1.9 (1.7)                     | 2.5 (1.6)                | <.001   |
| Screening intentions    | 4.1 (1.1)                     | 4.5 (0.9)                | <.001   |

Note. Possible score ranges were as follows: Overdetection knowledge 0 to 10, Breast cancer worry 1 to 4, Attitudes 6 to 30, Anticipated regret -4 to 4, Intentions 1 to 5. See Appendix for further details on measures. Groups were compared here using t tests.

Serial mediation analysis found that the total indirect effect of the intervention on intentions was statistically significant, indicating that the intervention influenced intentions indirectly through its effects on the combined set of mediators. Reading the intervention rather than the control decision aid was associated with a decrease in screening intentions as a result of all specific indirect causal sequences in the model (Table 3). As the direct effect was not significant, there was no evidence that the intervention affected intentions independently of its influence on the mediators modelled. The specific path coefficients are shown in Figure 1. The figure illustrates, for example, that participants who received the intervention decision aid demonstrated greater knowledge than controls, participants with greater knowledge expressed less positive attitudes, and participants with less positive attitudes also had less positive intentions.

Table 3 presents effect estimates and 95% CIs for the 15 specific indirect effects representing causal pathways through the various mediator sequences. The main significant indirect effects of the intervention on intentions were those involving knowledge and attitudes as mediators, both separately (IE1, IE13 in Table 3) and together in sequence (IE3). The first specific indirect effect (IE1) tested whether overdetection knowledge mediated the relationship between the decision aid received and subsequent breast screening intentions; this effect was significant. Relative to those assigned to the control decision aid, participants receiving the intervention demonstrated better knowledge about overdetection and consequently expressed lower intentions to have screening. Another significant effect, IE13 showed that the intervention resulted in less positive attitudes, which also led to lower screening intentions. IE3 tested the causal chain: intervention -> knowledge -> attitudes -> intentions. This was also significant and demonstrated that participants exposed to the intervention gained better overdetection knowledge, those with better knowledge had less positive

attitudes, and these attitudes were in turn associated with reduced intentions to screen. Pair-wise contrasts revealed that the three largest specific indirect effects (IE1, IE3, and IE13) did not significantly differ in size.

Table 3. Direct and indirect effects of the intervention on intentions via four sequential mediators

| Path                                               | Effect        | SE           | 95% CI        |               |
|----------------------------------------------------|---------------|--------------|---------------|---------------|
| <b>Total effect</b>                                | <b>-.2768</b> | <b>.0540</b> | <b>-.3828</b> | <b>-.1708</b> |
| Direct effect                                      | -.0192        | .0501        | -.1175        | .0791         |
| <b>Total indirect effect</b>                       | <b>-.2576</b> | <b>.0449</b> | <b>-.3488</b> | <b>-.1734</b> |
| Specific indirect effects (IEs)                    |               |              |               |               |
| <b>1. Knowledge</b>                                | <b>-.0731</b> | <b>.0267</b> | <b>-.1281</b> | <b>-.0230</b> |
| 2. Knowledge, worry                                | -.0010        | .0017        | -.0073        | .0007         |
| <b>3. Knowledge, attitudes</b>                     | <b>-.0700</b> | <b>.0171</b> | <b>-.1071</b> | <b>-.0396</b> |
| <b>4. Knowledge, anticipated regret</b>            | <b>-.0201</b> | <b>.0072</b> | <b>-.0375</b> | <b>-.0088</b> |
| 5. Knowledge, worry, attitudes                     | -.0001        | .0007        | -.0023        | .0011         |
| 6. Knowledge, worry, anticipated regret            | -.0004        | .0005        | -.0021        | .0002         |
| <b>7. Knowledge, attitudes, anticipated regret</b> | <b>-.0121</b> | <b>.0040</b> | <b>-.0220</b> | <b>-.0059</b> |
| 8. Knowledge, worry, attitudes, anticipated regret | -.0000        | .0001        | -.0004        | .0021         |
| 9. Worry                                           | -.0047        | .0050        | -.0191        | .0021         |
| 10. Worry, attitudes                               | -.0003        | .0027        | -.0063        | .0046         |
| <b>11. Worry, anticipated regret</b>               | <b>-.0020</b> | <b>.0014</b> | <b>-.0063</b> | <b>-.0003</b> |
| 12. Worry, attitudes, anticipated regret           | -.0001        | .0005        | -.0012        | .0008         |
| <b>13. Attitudes</b>                               | <b>-.0618</b> | <b>.0285</b> | <b>-.1178</b> | <b>-.0065</b> |
| <b>14. Attitudes, anticipated regret</b>           | <b>-.0106</b> | <b>.0056</b> | <b>-.0241</b> | <b>-.0016</b> |
| 15. Anticipated regret                             | -.0012        | .0104        | -.0216        | .0200         |

Note.  $n = 811$ ; 50,000 bootstrap samples; bias-corrected confidence intervals. The sequential mediators are: over-detection knowledge, breast cancer worry, attitudes, anticipated regret. Bold effects are significant ( $p < .05$ ).

The anticipated regret variable was also involved in several significant mediation pathways, influenced by knowledge and attitudes separately (IE4, IE14) and together (IE7). The most complex of the significant indirect effects was IE7 leading from the intervention  $\rightarrow$  over-detection knowledge  $\rightarrow$  screening attitude  $\rightarrow$  anticipated regret  $\rightarrow$  screening intention. Compared with the control group, women receiving the intervention had greater over-detection knowledge, which led to less positive attitudes (as above); these were in turn associated with lower anticipated regret for not screening (versus screening), which translated into reduced intentions to screen.



1  
2  
3 The specific indirect effect for the pathway through the complete causal chain involving all four  
4 mediators in sequence (IE8) – that is, adding breast cancer worry to the mediators discussed above –  
5 was not significant. Worry was part of only one significant indirect effect (IE11). The intervention  
6 reduced breast cancer worry; women with lower worry had lower anticipated regret for not  
7 screening, which again reduced screening intentions.  
8  
9

## 11 DISCUSSION

12  
13  
14 This study showed that the relationship between exposure to information on overdetection and  
15 women's subsequent breast screening intentions was mediated by multiple cognitive and affective  
16 pathways. The intervention decision aid substantially improved understanding of overdetection, and  
17 it influenced – both directly and indirectly via its effect on knowledge – women's attitudes towards  
18 having screening. The mediation analysis revealed that these mechanisms involving knowledge and  
19 attitudes were particularly important in determining intentions about screening participation.  
20 Anticipated regret played a role in several additional pathways linking knowledge, attitudes and  
21 intentions. As women became more knowledgeable about overdetection and their screening  
22 attitudes became less positive, this lessened their expectation that *not* screening would cause regret  
23 and increased the realisation that *screening* might cause regret, which in turn influenced intentions.  
24 The non-significance of the direct effect (i.e., relationship between study group and intentions after  
25 adjusting for all mediators) confirms that our model captured the key relevant constructs, suggesting  
26 little of the observed total effect was due to other differences between the intervention and control  
27 decision aids (e.g., length, newness of information, and time spent reading).  
28  
29

30  
31  
32 The randomised controlled trial design is a key strength of this study. Random allocation between  
33 two decision aids, differing only in the presence or absence of information about overdetection,  
34 enabled a rigorous test of the specific effects of this information when described in the context of  
35 other screening outcomes. Our serial mediation model controlled for a comprehensive set of  
36 baseline variables and examined plausible, theory-driven cause-effect relationships between  
37 exposure to the intervention and subsequently measured variables. Nonetheless, a limitation is that  
38 given the cross-sectional nature of the outcome and mediator data, we cannot definitively establish  
39 the causal ordering of these variables. While some of the group differences shown in Table 2 are  
40 small, our purpose in this article was not to establish the clinical significance of such differences (see  
41 elsewhere for more detailed analysis [16]) but rather to explore possible causal mechanisms  
42 involved. Whether the outcome variables in the serial mediation model are normally distributed or  
43 not, the inferences are likely to remain valid due to the large sample size of the study.[22, 29]  
44  
45  
46  
47  
48  
49  
50  
51  
52  
53  
54  
55  
56  
57  
58  
59  
60

Participants had not been screened in the 2 years prior to the study and were close to the age (50) at

1  
2  
3 which women are invited into the Australian national breast screening program. Intervention effects  
4 could vary in other populations depending on age and cultural context. For example, providing  
5 information about overdetected to women who already have more personal experience with  
6 screening (e.g., women in their sixties) might produce less of an effect on attitudes and intentions,  
7 as suggested by our previous qualitative research.[30]  
8  
9

10  
11 Although previous literature has reported on screening decisions aided by decision support  
12 techniques,[31, 32] little work to date has examined mechanisms for *how* information provided in  
13 such resources translates into decisions. Our mediation findings are in line with the explanatory  
14 account of health decisions offered by the theory of planned behaviour.[27, 28] Under this theory,  
15 attitudes towards a behaviour are determined by salient beliefs about its consequences (in this case,  
16 the understanding conveyed by the decision aid that overdetected is a possible consequence of  
17 screening); these attitudes in turn determine intentions. Our observed mediation effects involving  
18 anticipated regret accord with other empirical evidence supporting its usefulness as an extension to  
19 the theory of planned behaviour.[33] Worry about the threat of breast cancer, though emphasised  
20 by other health psychology theories, did not appear to play a major role in determining screening  
21 intentions among our study participants. While the power of emotion has been cited as a challenge  
22 for communicating harms of mammography,[34] our findings reinforce the vital role of good  
23 educational materials by demonstrating how evidence-based information influenced women's  
24 cognitions about screening and showing that cognitions, rather than emotions, were instrumental in  
25 decision making. Utilising a theoretical basis in behavioural psychology or decision making theory is  
26 often overlooked but may strengthen the design and evaluation of decision support materials,  
27 although operationalizing such theories can be challenging.[20] There is a need to develop and  
28 employ comprehensive theoretical frameworks that help us better understand the role of  
29 comprehension of benefits and harms in shaping informed screening decisions, as well as how  
30 external factors – such as conflicting information from different sources – may influence both  
31 information processing and decision making in this sometimes controversial area.[2, 35-37]  
32  
33  
34  
35  
36  
37  
38  
39  
40  
41  
42  
43  
44  
45

## 46 CONCLUSIONS

47  
48  
49 We have previously shown that giving women evidence-based written information about  
50 overdetected in breast screening can change women's screening intentions. Importantly, for the  
51 first time we now provide evidence, using mediation analysis, of how this cognitive and affective  
52 process works: the decision aid intervention achieved substantial knowledge gains, and thereby  
53 influenced attitudes and intentions towards screening. Our findings underline the importance of  
54 providing good-quality information to women when they are invited to consider screening, using  
55  
56  
57  
58  
59  
60

1  
2  
3  
4  
5  
6  
7  
8  
9  
10  
11  
12  
13  
14  
15  
16  
17  
18  
19  
20  
21  
22  
23  
24  
25  
26  
27  
28  
29  
30  
31  
32  
33  
34  
35  
36  
37  
38  
39  
40  
41  
42  
43  
44  
45  
46  
47  
48  
49  
50  
51  
52  
53  
54  
55  
56  
57  
58  
59  
60

materials with the capacity to successfully impart new and relevant knowledge. Effective communication tools and decision support resources are especially needed against a background of widely documented unrealistic public expectations of screening.[38] Our findings are a reminder that information can be a powerful intervention, and that the development of information resources must be done properly with rigour and care.

For peer review only

## DECLARATIONS

### Ethics approval and consent to participate

This study was approved by The University of Sydney human research ethics committee (2012/1429). Participants gave informed consent to take part in the study.

### Patient consent for publication

Not applicable

### Availability of data and material

The datasets used and/or analysed during the current study are available from the corresponding author on reasonable request.

### Funding

This work was supported by the National Health and Medical Research Council of Australia through Project Grant number 1062389.

### Competing interests

All authors have completed the ICMJE uniform disclosure form at [www.icmje.org/coi\\_disclosure.pdf](http://www.icmje.org/coi_disclosure.pdf) and declare: financial support from the National Health and Medical Research Council of Australia for the submitted work; no financial relationships with any organisations that might have an interest in the submitted work in the previous three years; no other relationships or activities that could appear to have influenced the submitted work.

### Authors' contributions

All authors contributed to study design. KMCC, AB, JJ, NH, HD, and KMcG obtained funding. JH, KMCC, and JJ led development of the intervention and implementation of the trial. KMcG advised on the statistical analysis. JH performed the statistical analysis, produced the tables and figure, and drafted the manuscript. All authors contributed to data interpretation and critically reviewed the manuscript.

### Acknowledgements

We thank Hazel Thornton for her contribution to the research project over many years, and for helpful comments on an earlier draft of this manuscript.

## REFERENCES

- 1 Harvey S. The charge and the challenges of breast cancer screening. *J Womens Health (Larchmt)* 2014;23(Suppl 1):S1-2. doi: 10.1089/jwh.2014.1509
- 2 Elmore JG. Breast cancer screening: balancing evidence with culture, politics, money, and media. In: Houssami N, Miglioretti D, eds. *Breast Cancer Screening: An Examination of Scientific Evidence*. Amsterdam: Elsevier 2016:1-27.
- 3 Welch HG, Black W. Overdiagnosis in cancer. *J Natl Cancer Inst* 2010;102:605-13. doi: 10.1093/jnci/djq099
- 4 Independent UK Panel on Breast Cancer Screening. The benefits and harms of breast cancer screening: an independent review. *Lancet* 2012;380:1778-86. doi: 10.1016/S0140-6736(12)61611-0
- 5 Jacklyn G, Glasziou P, Macaskill P, et al. Meta-analysis of breast cancer mortality benefit and overdiagnosis adjusted for adherence: improving information on the effects of attending screening mammography. *Br J Cancer* 2016;114:1269-76. doi: 10.1038/bjc.2016.90
- 6 Heath I. It is not wrong to say no. *BMJ* 2009;338:b2529. doi: 10.1136/bmj.b2529
- 7 Kirwan C. Breast cancer screening: what does the future hold? *BMJ* 2013;346:f87. doi: 10.1136/bmj.f87
- 8 Stefanek M. Uninformed compliance or informed choice? A needed shift in our approach to cancer screening. *J Natl Cancer Inst* 2011;103:1821-26. doi: 10.1093/jnci/djr474
- 9 Gummersbach E, Piccoliori G, Oriol Zerbe C, et al. Are women getting relevant information about mammography screening for an informed consent: a critical appraisal of information brochures used for screening invitation in Germany, Italy, Spain and France. *Eur J Public Health* 2010;20:409-14. doi: 10.1093/eurpub/ckp174
- 10 Jorgensen K, Gotzsche P. Content of invitations for publicly funded screening mammography. *BMJ* 2006;332:538-41. doi: 10.1136/bmj.332.7540.538
- 11 Zapka J, Geller B, Bulliard J, et al. Print information to inform decisions about mammography screening participation in 16 countries with population-based programs. *Patient Educ Couns* 2006;63:126-37. doi: 10.1016/j.pec.2005.09.012
- 12 Welch HG, Passow H. Quantifying the benefits and harms of screening mammography. *JAMA Intern Med* 2014;174:448-54. doi: 10.1001/jamainternmed.2013.13635
- 13 Loberg M, Lousdal ML, Bretthauer M, et al. Benefits and harms of mammography screening. *Breast Cancer Res* 2015;17:63. doi: 10.1186/s13058-015-0525-z
- 14 Biller-Andorno N, Juni P. Abolishing mammography screening programs? A view from the Swiss Medical Board. *N Engl J Med* 2014;370:1965-67. doi: 10.1056/NEJMp1401875
- 15 Schwartz L, Woloshin S, Sox H, et al. US women's attitudes to false positive mammography results and detection of ductal carcinoma in situ: cross sectional survey. *BMJ* 2000;320:1635-40. doi: 10.1136/bmj.320.7250.1635
- 16 Hersch J, Barratt A, Jansen J, et al. Use of a decision aid including information on overdiagnosis to support informed choice about breast cancer screening: a randomised controlled trial. *Lancet* 2015;385:1642-52. doi: 10.1016/S0140-6736(15)60123-4
- 17 Hersch J, Jansen J, Barratt A, et al. Overdiagnosis in breast cancer screening: development and preliminary evaluation of a decision aid. *BMJ Open* 2014;4:e006016. doi: 10.1136/bmjopen-2014-006016
- 18 Riddle M, Science of Behavior Change Working Group. News from the NIH: using an experimental medicine approach to facilitate translational research. *Transl Behav Med* 2015;5(4):486-8. doi: 10.1007/s13142-015-0333-0
- 19 Kronen T, Keller H, Becker A, et al. The theory of planned behaviour in a randomized trial of a decision aid on cardiovascular risk prevention. *Patient Educ Couns* 2010;78(2):169-76. doi: 10.1016/j.pec.2009.06.010

- 1  
2  
3 20 Elwyn G, Stiel M, Durand MA, et al. The design of patient decision support interventions:  
4 addressing the theory-practice gap. *J Eval Clin Pract* 2011;17:565-74. doi: 10.1111/j.1365-  
5 2753.2010.01517.x  
6  
7 21 Armitage CJ, Conner M. Social cognition models and health behaviour: a structured review.  
8 *Psychol Health* 2000;15:173-89. doi: 10.1080/08870440008400299  
9  
10 22 Hayes AF. Introduction to Mediation, Moderation, and Conditional Process Analysis: A  
11 Regression-Based Approach. New York: Guilford 2013:xvii, 507.  
12  
13 23 Hersch J, Barratt A, Jansen J, et al. The effect of information about overdetection of breast cancer  
14 on women's decision-making about mammography screening: study protocol for a randomised  
15 controlled trial. *BMJ Open* 2014;4:e004990. doi: 10.1136/bmjopen-2014-004990  
16  
17 24 Dormandy E, Michie S, Hooper R, et al. Informed choice in antenatal Down syndrome screening: a  
18 cluster-randomised trial of combined versus separate visit testing. *Patient Educ Couns*  
19 2006;61:56-64. doi: 10.1016/j.pec.2005.02.006  
20  
21 25 Sandberg T, Hutter R, Richetin J, et al. Testing the role of action and inaction anticipated regret on  
22 intentions and behaviour. *Br J Soc Psychol* 2016;55:407-25. doi: 10.1111/bjso.12141  
23  
24 26 Sivell S, Elwyn G, Edwards A, et al. Factors influencing the surgery intentions and choices of  
25 women with early breast cancer: the predictive utility of an extended theory of planned  
26 behaviour. *BMC Med Inform Decis Mak* 2013;13:92. doi: 10.1186/1472-6947-13-92  
27  
28 27 Ajzen I. The theory of planned behavior. *Organ Behav Hum Decis Process* 1991;50:179-211. doi:  
29 10.1016/0749-5978%2891%2990020-T  
30  
31 28 Ajzen I. Martin Fishbein's legacy: the reasoned action approach. *Ann Am Acad Pol Soc Sci*  
32 2012;640:11-27. doi: 10.1177/0002716211423363  
33  
34 29 Lumley T, Diehr P, Emerson S, et al. The importance of the normality assumption in large public  
35 health data sets. *Annu Rev Public Health* 2002;23:151-69. doi:  
36 10.1146/annurev.publhealth.23.100901.140546  
37  
38 30 Hersch J, Jansen J, Barratt A, et al. Women's views on overdiagnosis in breast cancer screening: a  
39 qualitative study. *BMJ* 2013;346:f158. doi: 10.1136/bmj.f158  
40  
41 31 Biesecker B, Schwartz M, Marteau T. Enhancing informed choice to undergo health screening: a  
42 systematic review. *Am J Health Behav* 2013;37:351-59. doi: 10.5993/AJHB.37.3.8  
43  
44 32 van Agt H, Korfage I, Essink-Bot M. Interventions to enhance informed choices among invitees of  
45 screening programmes – a systematic review. *Eur J Public Health* 2014;24:789-801. doi:  
46 10.1093/eurpub/ckt205  
47  
48 33 Sandberg T, Conner M. Anticipated regret as an additional predictor in the theory of planned  
49 behaviour: a meta-analysis. *Br J Soc Psychol* 2008;47:589-606. doi: 10.1348/014466607X258704  
50  
51 34 Rosenbaum L. Invisible risks, emotional choices – mammography and medical decision making. *N*  
52 *Engl J Med* 2014;371(16):1549-52. doi: 10.1056/NEJMms1409003  
53  
54 35 Steckelberg A, Kasper J, Mühlhauser I. Selective information seeking: can consumers' avoidance  
55 of evidence-based information on colorectal cancer screening be explained by the theory of  
56 cognitive dissonance? *German Medical Science* 2007;5:Doc05.  
57  
58 36 Baena-Canada JM, Rosado-Varela P, Exposito-Alvarez I, et al. Using an informed consent in  
59 mammography screening: a randomized trial. *Cancer Med* 2015;4:1923-32. doi:  
60 10.1002/cam4.525  
61  
62 37 Petrova D, Garcia-Retamero R, Catena A, et al. To screen or not to screen: What factors influence  
63 complex screening decisions? *J Exp Psychol Appl* 2016;22:247-60. doi: 10.1037/xap0000086  
64  
65 38 Hoffmann T, Del Mar C. Patients' expectations of the benefits and harms of treatments,  
66 screening, and tests: a systematic review. *JAMA Intern Med* 2015;175:274-86. doi:  
10.1001/jamainternmed.2014.6016

**FIGURES**

Fig. 1. Title: Multiple mediation model of decision aid effects on breast screening intentions via four sequential mediators

Fig. 1. Legend: Graphic representation of the serial multiple mediation model of decision aid effects on breast screening intentions via four sequential mediators (overdetection knowledge, breast cancer worry, screening attitudes, and anticipated regret). The intervention was hypothesised to exert an effect on screening intentions through the four mediators in sequence. Outcome and mediator variables were standardised prior to analysis. Bold coefficients are significant ( $p < .05$ ). Analyses controlled for baseline measures including screening intentions and attitudes, basic screening knowledge, stage of decision making, breast cancer family history, birthplace, main language spoken, education, marital status, parent status, work status, and age.

1  
2  
3  
4  
5  
6  
7  
8  
9  
10  
11  
12  
13  
14  
15  
16  
17  
18  
19  
20  
21  
22  
23  
24  
25  
26  
27  
28  
29  
30  
31  
32  
33  
34  
35  
36  
37  
38  
39  
40  
41  
42  
43  
44  
45  
46  
47  
48  
49  
50  
51  
52  
53  
54  
55  
56  
57  
58  
59  
60

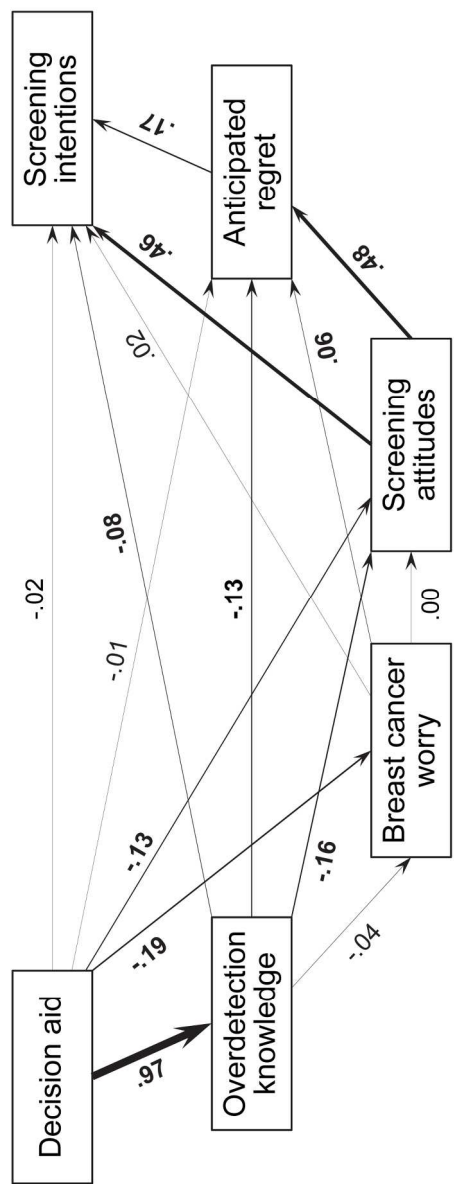

Multiple mediation model of decision aid effects on breast screening intentions via four sequential mediators

Graphic representation of the serial multiple mediation model of decision aid effects on breast screening intentions via four sequential mediators (overdetection knowledge, breast cancer worry, screening attitudes, and anticipated regret). The intervention was hypothesised to exert an effect on screening intentions through the four mediators in sequence. Outcome and mediator variables were standardised prior to analysis. Bold coefficients are significant ( $p < .05$ ). Analyses controlled for baseline measures including screening intentions and attitudes, basic screening knowledge, stage of decision making, breast cancer family history, birthplace, main language spoken, education, marital status, parent status, work status, and age.

87x225mm (300 x 300 DPI)



1  
2  
3  
4  
5  
6  
7  
8  
9  
10  
11  
12  
13  
14  
15  
16  
17  
18  
19  
20  
21  
22  
23  
24  
25  
26  
27  
28  
29  
30  
31  
32  
33  
34  
35  
36  
37  
38  
39  
40  
41  
42  
43  
44  
45  
46  
47  
48  
49  
50  
51  
52  
53  
54  
55  
56  
57  
58  
59  
60

For peer review only

1  
2  
3 **Measurement of outcome and mediator variables used in:**  
4

5  
6 **Hersch J et al. How information about overdetection changes breast cancer screening decisions:**  
7 **a mediation analysis within a randomised controlled trial**  
8

9  
10  
11 This appendix contains the questions used for the measures included in the mediation analysis,  
12 including the range of available response options, and describes how each score was calculated.  
13

14  
15 The questions were administered during a structured, computer-assisted telephone interview that  
16 took place after the participant had read her allocated decision aid.  
17

18  
19  
20  
21  
22  
23  
24  
25  
26  
27  
28  
29  
30  
31  
32  
33  
34  
35  
36  
37  
38  
39  
40  
41  
42  
43  
44  
45  
46  
47  
48  
49  
50  
51  
52  
53  
54  
55  
56  
57  
58  
59  
60

For peer review only

### Knowledge about overdetection

OC1. Who do you think is more likely to be diagnosed with breast cancer?

- Women who have screening mammograms [1]
- Women who do not have screening mammograms [0]

OC2. All breast cancers will eventually cause illness and death if they are not found and treated.

- TRUE [0]
- FALSE [1]

OC3. When screening finds cancer, doctors can reliably predict whether it will ever cause harm.

- TRUE [0]
- FALSE [1]

OC4. Even breast cancers that may not cause any health problems are likely to be treated.

- TRUE [1]
- FALSE [0]

OC5. Screening leads some women with a harmless cancer to get treatment they do not need.

- TRUE [1]
- FALSE [0]

OC6. Screening finds harmless cancers more often than it prevents death from breast cancer.

- TRUE [1]
- FALSE [0]

OC7. Which of these 2 statements best describes over-detection?

- Screening finds a cancer that would never have caused trouble [1]
- Screening finds an abnormality but extra tests show it is not cancer [0]

*I would like you to imagine 1000 ordinary women who are 50 years old.*

BN1. *If these 1,000 women have breast screening every 2 years for 20 years, in that time about how many women do you think will avoid dying from breast cancer because of screening?*

\_\_\_\_\_

ON1. *If these 1,000 women have screening every 2 years for 20 years, in that time about how many will be diagnosed and treated for a breast cancer that is not harmful?*

\_\_\_\_\_

1 mark was awarded if the answer given for ON1 was greater than the answer given for BN1.

1 mark was awarded if the answer given for ON1 was between 6 and 57. An additional

1 mark was awarded if the answer given for ON1 was between 10 and 38.

**Marks were allocated as indicated above, and summed for a total score ranging between 0 and 10. Higher scores reflect better knowledge.**

### Attitudes to breast screening

For you, having breast screening is: Beneficial

- Strongly agree [5]
- Agree [4]
- Neither agree nor disagree [3]
- Disagree [2]
- Strongly disagree [1]

For you, having breast screening is: A good thing

- Strongly agree [5]
- Agree [4]
- Neither agree nor disagree [3]
- Disagree [2]
- Strongly disagree [1]

For you, having breast screening is: Harmful

- Strongly agree [1]
- Agree [2]
- Neither agree nor disagree [3]
- Disagree [4]
- Strongly disagree [5]

For you, having breast screening is: Worthwhile

- Strongly agree [5]
- Agree [4]
- Neither agree nor disagree [3]
- Disagree [2]
- Strongly disagree [1]

For you, having breast screening is: Important

- Strongly agree [5]
- Agree [4]
- Neither agree nor disagree [3]
- Disagree [2]
- Strongly disagree [1]

For you, having breast screening is: A bad thing

- Strongly agree [1]
- Agree [2]
- Neither agree nor disagree [3]
- Disagree [4]
- Strongly disagree [5]

Scores were allocated as indicated above, and summed for a total score ranging between 6 and 30. Higher scores reflect more positive attitudes.

### Anticipated regret

If you do NOT have breast screening in the next few years, you may later wish you DID.

- Strongly agree [5]
- Agree [4]
- Neither agree nor disagree [3]
- Disagree [2]
- Strongly disagree [1]

Higher scores above indicate greater anticipated regret for *not* screening (inaction score).

If you DO have breast screening in the next few years, you may later wish you did NOT.

- Strongly agree [5]
- Agree [4]
- Neither agree nor disagree [3]
- Disagree [2]
- Strongly disagree [1]

Higher scores above indicate greater anticipated regret for screening (action score).

**The action score was subtracted from the inaction score to produce a differential anticipated regret score ranging between -4 and 4. Higher scores reflect greater anticipated regret for *not* screening, adjusted for anticipated regret for screening.**

### Worry about breast cancer

How worried are you about developing breast cancer?

- Not worried at all [0]
- A bit worried [1]
- Quite worried [2]
- Very worried [3]

**Scores were allocated as indicated above. Higher scores reflect greater worry.**

### Intentions about breast screening

At the moment, which of the following best describes your intentions about having breast screening within the next 2-3 years?

- You definitely will have breast screening [5]
- You are likely to have breast screening [4]
- You are unsure [3]
- You are not likely to have breast screening [2]
- You definitely will not have breast screening [1]

**Scores were allocated as indicated above. Higher scores reflect more positive intentions.**

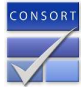

## CONSORT 2010 checklist of information to include when reporting a randomised trial\*

| Section/Topic             | Item No | Checklist item                                                                                                                        | Reported on page No       |
|---------------------------|---------|---------------------------------------------------------------------------------------------------------------------------------------|---------------------------|
| <b>Title and abstract</b> |         |                                                                                                                                       |                           |
|                           | 1a      | Identification as a randomised trial in the title                                                                                     | 1                         |
|                           | 1b      | Structured summary of trial design, methods, results, and conclusions (for specific guidance see CONSORT for abstracts)               | 2                         |
| <b>Introduction</b>       |         |                                                                                                                                       |                           |
| Background and objectives | 2a      | Scientific background and explanation of rationale                                                                                    | 4                         |
|                           | 2b      | Specific objectives or hypotheses                                                                                                     | 5                         |
| <b>Methods</b>            |         |                                                                                                                                       |                           |
| Trial design              | 3a      | Description of trial design (such as parallel, factorial) including allocation ratio                                                  | 5 + protocol[1]           |
|                           | 3b      | Important changes to methods after trial commencement (such as eligibility criteria), with reasons                                    | n/a                       |
| Participants              | 4a      | Eligibility criteria for participants                                                                                                 | 5 + protocol[1]           |
|                           | 4b      | Settings and locations where the data were collected                                                                                  | 5-6                       |
| Interventions             | 5       | The interventions for each group with sufficient details to allow replication, including how and when they were actually administered | 6 + published protocol[1] |
| Outcomes                  | 6a      | Completely defined pre-specified primary and secondary outcome measures, including how and when they were assessed                    | 6 + published protocol[1] |
|                           | 6b      | Any changes to trial outcomes after the trial commenced, with reasons                                                                 | n/a                       |
| Sample size               | 7a      | How sample size was determined                                                                                                        | Protocol[1]               |

|                                                      |     |                                                                                                                                                                                             |                 |
|------------------------------------------------------|-----|---------------------------------------------------------------------------------------------------------------------------------------------------------------------------------------------|-----------------|
|                                                      | 7b  | When applicable, explanation of any interim analyses and stopping guidelines                                                                                                                | n/a             |
| <b>Randomisation:</b>                                |     |                                                                                                                                                                                             |                 |
| Sequence generation                                  | 8a  | Method used to generate the random allocation sequence                                                                                                                                      | Lancet[2]       |
|                                                      | 8b  | Type of randomisation; details of any restriction (such as blocking and block size)                                                                                                         | Protocol[1]     |
| Allocation concealment mechanism                     | 9   | Mechanism used to implement the random allocation sequence (such as sequentially numbered containers), describing any steps taken to conceal the sequence until interventions were assigned | 5               |
| Implementation                                       | 10  | Who generated the random allocation sequence, who enrolled participants, and who assigned participants to interventions                                                                     | 5 + protocol[1] |
| Blinding                                             | 11a | If done, who was blinded after assignment to interventions (for example, participants, care providers, those assessing outcomes) and how                                                    | 5-6             |
|                                                      | 11b | If relevant, description of the similarity of interventions                                                                                                                                 | 6               |
| Statistical methods                                  | 12a | Statistical methods used to compare groups for primary and secondary outcomes                                                                                                               | Lancet[2]       |
|                                                      | 12b | Methods for additional analyses, such as subgroup analyses and adjusted analyses                                                                                                            | 6-7             |
| <b>Results</b>                                       |     |                                                                                                                                                                                             |                 |
| Participant flow (a diagram is strongly recommended) | 13a | For each group, the numbers of participants who were randomly assigned, received intended treatment, and were analysed for the primary outcome                                              | 7 + Lancet[2]   |
|                                                      | 13b | For each group, losses and exclusions after randomisation, together with reasons                                                                                                            | 7 + Lancet[2]   |
| Recruitment                                          | 14a | Dates defining the periods of recruitment and follow-up                                                                                                                                     | Lancet[2]       |
|                                                      | 14b | Why the trial ended or was stopped                                                                                                                                                          | n/a             |
| Baseline data                                        | 15  | A table showing baseline demographic and clinical characteristics for each group                                                                                                            | 8               |
| Numbers analysed                                     | 16  | For each group, number of participants (denominator) included in each analysis and whether the analysis was by original assigned groups                                                     | 7 + Lancet[2]   |

|                          |     |                                                                                                                                                   |                |
|--------------------------|-----|---------------------------------------------------------------------------------------------------------------------------------------------------|----------------|
| Outcomes and estimation  | 17a | For each primary and secondary outcome, results for each group, and the estimated effect size and its precision (such as 95% confidence interval) | 9-10           |
|                          | 17b | For binary outcomes, presentation of both absolute and relative effect sizes is recommended                                                       | n/a            |
| Ancillary analyses       | 18  | Results of any other analyses performed, including subgroup analyses and adjusted analyses, distinguishing pre-specified from exploratory         | 9-10           |
| Harms                    | 19  | All important harms or unintended effects in each group (for specific guidance see CONSORT for harms)                                             | n/a            |
| <b>Discussion</b>        |     |                                                                                                                                                   |                |
| Limitations              | 20  | Trial limitations, addressing sources of potential bias, imprecision, and, if relevant, multiplicity of analyses                                  | 11             |
| Generalisability         | 21  | Generalisability (external validity, applicability) of the trial findings                                                                         | 11-12          |
| Interpretation           | 22  | Interpretation consistent with results, balancing benefits and harms, and considering other relevant evidence                                     | 11-12          |
| <b>Other information</b> |     |                                                                                                                                                   |                |
| Registration             | 23  | Registration number and name of trial registry                                                                                                    | 2              |
| Protocol                 | 24  | Where the full trial protocol can be accessed, if available                                                                                       | 16             |
| Funding                  | 25  | Sources of funding and other support (such as supply of drugs), role of funders                                                                   | 14 + Lancet[2] |

\*We strongly recommend reading this statement in conjunction with the CONSORT 2010 Explanation and Elaboration for important clarifications on all the items. If relevant, we also recommend reading CONSORT extensions for cluster randomised trials, non-inferiority and equivalence trials, non-pharmacological treatments, herbal interventions, and pragmatic trials. Additional extensions are forthcoming: for those and for up to date references relevant to this checklist, see [www.consort-statement.org](http://www.consort-statement.org).

1 Hersch J, Barratt A, Jansen J, et al. The effect of information about overdetection of breast cancer on women's decision-making about mammography screening: study protocol for a randomised controlled trial. *BMJ Open* 2014;4:e004990. doi: 10.1136/bmjopen-2014-004990

2 Hersch J, Barratt A, Jansen J, et al. Use of a decision aid including information on overdetection to support informed choice about breast cancer screening: a randomised controlled trial. *Lancet* 2015;385:1642-52. doi: 10.1016/S0140-6736(15)60123-4



# BMJ Open

## How information about overdetection changes breast cancer screening decisions: a mediation analysis within a randomised controlled trial

|                                 |                                                                                                                                                                                                                                                                                                                                                                                                                                                                                                                                                                                                               |
|---------------------------------|---------------------------------------------------------------------------------------------------------------------------------------------------------------------------------------------------------------------------------------------------------------------------------------------------------------------------------------------------------------------------------------------------------------------------------------------------------------------------------------------------------------------------------------------------------------------------------------------------------------|
| Journal:                        | <i>BMJ Open</i>                                                                                                                                                                                                                                                                                                                                                                                                                                                                                                                                                                                               |
| Manuscript ID                   | bmjopen-2017-016246.R2                                                                                                                                                                                                                                                                                                                                                                                                                                                                                                                                                                                        |
| Article Type:                   | Research                                                                                                                                                                                                                                                                                                                                                                                                                                                                                                                                                                                                      |
| Date Submitted by the Author:   | 14-Aug-2017                                                                                                                                                                                                                                                                                                                                                                                                                                                                                                                                                                                                   |
| Complete List of Authors:       | Hersch, Jolyn; University of Sydney, School of Public Health<br>McGeechan, Kevin; University of Sydney, School of Public Health<br>Barratt, Alexandra; University of Sydney, School of Public Health<br>Jansen, Jesse; University of Sydney, School of Public Health<br>Irwig, Les; University of Sydney, School of Public Health<br>Jacklyn, Gemma; University of Sydney, School of Public Health<br>Houssami, Nehmat; University of Sydney, School of Public Health<br>Dhillon, Haryana; University of Sydney, Central Clinical School<br>McCaffery, Kirsten; University of Sydney, School of Public Health |
| <b>Primary Subject Heading</b>: | Communication                                                                                                                                                                                                                                                                                                                                                                                                                                                                                                                                                                                                 |
| Secondary Subject Heading:      | Public health                                                                                                                                                                                                                                                                                                                                                                                                                                                                                                                                                                                                 |
| Keywords:                       | Breast imaging < RADIOLOGY & IMAGING, Overdiagnosis, Decision aid, Informed decision making, Cancer screening, Mediation                                                                                                                                                                                                                                                                                                                                                                                                                                                                                      |
|                                 |                                                                                                                                                                                                                                                                                                                                                                                                                                                                                                                                                                                                               |

SCHOLARONE™  
Manuscripts

only

**TITLE**

How information about overdetection changes breast cancer screening decisions: a mediation analysis within a randomised controlled trial

**AUTHORS**

Jolyn Hersch<sup>1,2,3</sup>, jolyn.hersch@sydney.edu.au (corresponding author)

Kevin McGeechan<sup>1,2,3</sup>, kevin.mcgeechan@sydney.edu.au

Alexandra Barratt<sup>1,2,3</sup>, alexandra.barratt@sydney.edu.au

Jesse Jansen<sup>1,2,3</sup>, jesse.jansen@sydney.edu.au

Les Irwig<sup>1,2</sup>, les.irwig@sydney.edu.au

Gemma Jacklyn<sup>1,2</sup>, gemma.jacklyn@sydney.edu.au

Nehmat Houssami<sup>1,2</sup>, nehmat.houssami@sydney.edu.au

Haryana Dhillon<sup>3,4</sup>, haryana.dhillon@sydney.edu.au

Kirsten McCaffery<sup>1,2,3</sup>, kirsten.mccaffery@sydney.edu.au

**AFFILIATIONS**

<sup>1</sup>School of Public Health, Sydney Medical School, The University of Sydney, Australia.

<sup>2</sup>Wiser Healthcare, The University of Sydney, Australia.

<sup>3</sup>Centre for Medical Psychology and Evidence-based Decision-making (CeMPED), The University of Sydney, Australia.

<sup>4</sup>Central Clinical School, Sydney Medical School, The University of Sydney, Australia.

**CORRESPONDING AUTHOR**

Jolyn Hersch

School of Public Health  
Edward Ford Building (A27)  
The University of Sydney  
NSW 2006  
AUSTRALIA

jolyn.hersch@sydney.edu.au

+612 9036 9042

**WORD COUNT**

2972

**ABSTRACT**

Objectives: In a randomised controlled trial, we found that informing women about overdetected changed their breast screening decisions. We now present a mediation analysis exploring the psychological pathways through which study participants who received the intervention processed information about overdetected and how this influenced their decision making. We examined a series of potential mediators in the causal chain between exposure to overdetected information and women's subsequently reported breast screening intentions.

Design: Serial multiple mediation analysis within a randomised controlled trial

Setting: New South Wales, Australia

Participants: 811 women aged 48–50 years with no personal history of breast cancer

Interventions: Two versions of a decision aid giving women information about breast cancer deaths averted and false positives from mammography screening, either with (intervention) or without (control) information on overdetected

Main outcome: Intentions to undergo breast cancer screening in the next 2–3 years

Mediators: Knowledge about overdetected, worry about breast cancer, attitudes towards breast screening, and anticipated regret

Results: The effect of information about overdetected on women's breast screening intentions was mediated through multiple cognitive and affective processes. In particular, the information led to substantial improvements in women's understanding of overdetected, and it influenced – both directly and indirectly via its effect on knowledge – their attitudes towards having screening.

Mediation analysis showed that the mechanisms involving knowledge and attitudes were particularly important in determining women's intentions about screening participation.

Conclusions: Even in this emotive context, new information influenced women's decision making by changing their understanding of possible consequences of screening and their attitudes towards undergoing it. These findings emphasise the need to provide good-quality information on screening outcomes, and to communicate this information effectively, so that women can make well-informed decisions.

Trial registration: This study was prospectively registered with the Australian New Zealand Clinical Trials Registry (ACTRN12613001035718) on 17 September 2013.

**STRENGTHS AND LIMITATIONS OF THIS STUDY**

- Random allocation between two decision aids, differing only in the presence or absence of information about overdiagnosis, enabled a rigorous test of the specific effects of this information when described in the context of other screening outcomes.
- Participants were women entering the target age range for breast screening, who were sampled randomly from the general community and were facing real decisions.
- Our serial mediation model controlled for a comprehensive set of baseline variables and examined plausible, theory-driven cause–effect relationships between exposure to the intervention and subsequently measured variables.
- Nonetheless, given the cross-sectional nature of the outcome and mediator data, we cannot definitively establish the causal sequence of these variables.

**KEYWORDS**

Breast imaging

Overdiagnosis

Decision aid

Informed decision making

Cancer screening

Mediation

1  
2  
3 Breast cancer screening is a complex and emotionally charged issue,[1] a topic surrounded by what  
4 has been described as a perfect storm of politics and science.[2] While screening can reduce deaths  
5 from breast cancer, it can also cause harm through the counterintuitive phenomenon of  
6 overdiagnosis. The term overdiagnosis is increasingly accepted in the specific  
7 context of screening to distinguish it from overdiagnosis that occurs via other mechanisms, such as  
8 broadening disease definitions. An overdiagnosed breast cancer is one found by screening, and  
9 consequently treated, that would not have caused any health problems had it been left undetected  
10 and untreated.[3] Without screening, such a cancer would never have been diagnosed.  
11 Overdiagnosed cancers are 'real' cancers in the sense that they meet current pathological criteria for  
12 cancer diagnosis, but finding and treating them does not improve health outcomes. Such a diagnosis  
13 and the resulting treatment can cause serious lifelong harm, and overdiagnosis is therefore  
14 considered the major downside to breast screening.  
15  
16  
17  
18  
19  
20  
21  
22

23 Mounting evidence of the extent of overdiagnosis (estimated as 19% of breast cancers diagnosed in  
24 women invited to screen from age 50 to 69 [4] and 30% for those who attend screening [5]) has led  
25 to recognition that the benefits and harms of breast screening are finely balanced for women at  
26 population-level risk of breast cancer. The risk of overdiagnosis and its consequences must be  
27 weighed against the benefit of reducing breast cancer mortality (relative risk reduction estimated as  
28 20% for women invited to screen from age 50 to 69 [4] and 30% for those screened [5]). Experts  
29 familiar with the evidence now acknowledge that individual women may perceive the harm-benefit  
30 trade-off differently depending on their personal context and preferences – some will opt for  
31 screening while others decline, and either choice may be appropriate if it represents an informed  
32 decision.[6-8] Throughout the history of breast screening, however, women invited to participate  
33 have not been given all the relevant information.[9-11] Consensus is growing that information on  
34 screening benefits and harms, including overdiagnosis, must be communicated clearly and  
35 transparently to women offered screening so that they can make informed decisions about whether  
36 to be screened.[4, 12, 13] This is all the more important because of evidence that women hold  
37 misconceptions about breast screening and its effects.[14, 15]  
38  
39  
40  
41  
42  
43  
44  
45  
46  
47

48 Against the background of this recommended shift in communication, the issue of how information  
49 about overdiagnosis affects women and their screening decisions is critical. In a randomised trial we  
50 addressed this question in women approaching the recommended age for starting mammography  
51 screening (age 50, when women are invited for screening in many countries including Australia).[16]  
52 We sent women one of two versions of a decision aid (evidence-based information booklet) giving  
53 information about breast cancer deaths averted and false positives from screening (abnormal  
54  
55  
56  
57  
58  
59  
60

1  
2  
3 mammograms in women without cancer), either with or without information on overdetecion.[17]  
4 The intervention produced several significant effects on decision making.[16] The additional  
5 overdetecion information improved knowledge, increased the number of women making an  
6 informed choice about screening (primary outcome of the trial), and also reduced positive attitudes  
7 to screening and the number of women intending to be screened.[16]  
8  
9  
10

11 From our study design – chosen to identify the specific impact of information about overdetecion –  
12 it appears that communicating this information influenced women’s assessment of the value of  
13 screening to them, leading to lower intentions to be screened within the intervention group. This  
14 finding has never been observed before, and raises important questions. To facilitate the translation  
15 of intervention research findings into other contexts, it is recommended to test hypothesised causal  
16 mechanisms.[18] However, causal processes leading from the use of decision aids to the decisions  
17 subsequently made are not well understood, as few studies have addressed questions about how  
18 these interventions achieve their effects.[19] Only recently have decision aid developers started to  
19 critically examine in detail how behavioural, cognitive and social theories of decision making could  
20 inform the design and evaluation of decision support interventions.[20] In this paper we explore the  
21 psychological pathways through which study participants processed overdetecion information and  
22 integrated it into their decision making. We provide an explanatory account incorporating cognitive  
23 and affective pathways, using psychological theories [21] and mediation analysis.[22]  
24  
25  
26  
27  
28  
29  
30  
31  
32  
33  
34  
35

## 36 **METHODS**

37 We did a parallel-group randomised controlled trial with women aged 48-50 years, recruited from  
38 the general community in New South Wales, Australia. The trial is described in detail elsewhere.[16,  
39 23] Trained interviewers from an independent non-profit company recruited participants via  
40 telephone. Women were eligible if they had not undergone mammography in the past 2 years and  
41 did not have a personal or strong family history of breast cancer. Participants knew they would  
42 receive one of two versions of a breast screening information booklet but did not know how these  
43 differed or which was the intervention.  
44  
45  
46  
47  
48  
49

50 We collected sociodemographics and baseline data on women’s stage of decision making (how far  
51 along they were with their decision about breast screening), basic conceptual knowledge, attitudes,  
52 and intentions (Table 1).[16, 23] We then randomly assigned 879 women to the intervention (n=440)  
53 or control group (n=439) and sent their allocated decision aid by post. A programmer who had no  
54  
55  
56  
57  
58  
59  
60

1  
2  
3 contact with participants generated the randomisation sequence, which was inaccessible until after  
4 recruitment, ensuring allocation concealment.  
5

6  
7 The intervention decision aid contained evidence-based explanatory and quantitative information  
8 about important outcomes of undergoing screening biennially from age 50 to 69 years (breast  
9 cancer mortality reduction, overdetected, and false positives) compared with not screening over  
10 this period. The control decision aid omitted all overdetected content but was otherwise identical to  
11 the intervention. The decision aids were short booklets combining text and visual formats, and are  
12 published.[16, 17]  
13

14  
15  
16  
17 Our purpose in the analysis reported here was to explore causal pathways between exposure to  
18 information about overdetected in a decision aid (intervention) and subsequent breast screening  
19 intentions (outcome). We examined a series of potential mediators of this relationship: knowledge  
20 about overdetected, worry about breast cancer, attitudes towards breast screening, and anticipated  
21 regret. We collected follow-up data for these variables using standardised questions in a structured  
22 post-intervention telephone interview, 1-4 weeks after randomisation. The participant's group  
23 assignment was unknown to the interviewer until the end of the interview.  
24  
25  
26  
27  
28

29  
30 Our post-intervention knowledge scale assessed conceptual understanding of three key screening  
31 outcomes (breast cancer mortality reduction, overdetected, and false positives) and awareness of  
32 the approximate numbers affected.[16] For the mediation analysis we used the overdetected  
33 knowledge subscale (scored 0 to 10, including conceptual and numeric components) because  
34 conveying this new information was the main aim of the intervention. We assessed attitudes to  
35 breast screening via a widely used 6-item instrument (possible range 6 to 30), intentions to undergo  
36 screening in the next 2-3 years (1 item, 5-point response scale from *definitely* to *definitely not*), and  
37 worry about developing breast cancer (1 item, 4-point scale).[16, 23, 24] Higher scores on these  
38 measures reflect better knowledge, more positive attitudes and intentions, and greater worry,  
39 respectively. We collected women's anticipated regret both for screening (anticipating that if she  
40 undergoes screening (action) she may later wish she had not) and *not* screening (anticipating that if  
41 she does not undergo screening (inaction) she may later wish she had).[25] We then calculated a  
42 differential anticipated regret score [26] by subtracting the action from the inaction score. Higher  
43 scores on the resulting measure (possible range -4 to 4) reflect greater anticipated regret for *not*  
44 screening, adjusted for the woman's anticipated regret for screening. See the Appendix for further  
45 details about these measures.  
46  
47  
48  
49  
50  
51  
52  
53  
54  
55  
56  
57  
58  
59  
60

1  
2  
3 We tested whether these variables functioned in a chain with a specified direction of causal flow  
4 (serial mediation).[22] Based on health psychology theories (e.g., theory of planned behaviour [27,  
5 28]) we tested the following causal chain: intervention (group allocation) -> over-detection  
6 knowledge -> worry -> attitudes -> anticipated regret -> intentions. One could hypothesise, for  
7 example, that exposure to information (if communicated effectively) should increase knowledge  
8 about over-detection. Understanding that some breast cancers would not cause harm even if  
9 untreated might reduce worry about breast cancer, which may affect attitudes towards screening.  
10 Anticipation of feeling regret if one does not (vs does) undergo screening might depend on attitudes  
11 and in turn influence intentions.  
12

13  
14  
15  
16  
17  
18 Mediation models were tested using model 6 in the PROCESS macro (Version 2.16) for SPSS (Version  
19 24).[22] This procedure applies an ordinary least squares path analytic framework to estimate both  
20 direct and indirect effects of the intervention on screening intentions. To derive these effects,  
21 PROCESS fits a series of linear regression models with each variable treated as the outcome in turn.  
22 The regression coefficients estimate how each variable affects other variables later in the sequence.  
23 Baseline variables in Table 1 (all measured pre-intervention, including baseline screening intentions)  
24 were statistically controlled by including them as covariates during mediation analyses. Outcome  
25 and mediator variables were standardised (expressed in units of standard deviations from the  
26 sample mean) for the mediation analysis. We used a bootstrapping procedure in order to conduct  
27 inference tests for the indirect effects. This involved repeatedly drawing samples (with replacement)  
28 of size n (where n equals the original sample size) from the existing data, and then estimating the  
29 indirect effect in each resampled dataset. By repeating this process thousands of times, PROCESS  
30 generated an empirical approximation of the underlying sampling distribution of the indirect effect  
31 which was then used to construct a confidence interval for the effect. In this study, 50,000 bootstrap  
32 samples were used to create 95% bias-corrected confidence intervals (95% CIs) for the indirect  
33 effects (IEs), which we considered significant if the CI did not include zero.  
34  
35  
36  
37  
38  
39  
40  
41  
42  
43  
44  
45  
46  
47

## 48 RESULTS

49  
50 Of 879 participants randomised, 838 completed the follow-up interview. Among these, 27 did not  
51 answer all relevant questions and were excluded from the mediation analysis. Sociodemographic  
52 characteristics were similar for randomised participants who were and were not included in the  
53 mediation analysis. Table 1 shows baseline characteristics of the 811 included participants, which  
54 were well balanced between the intervention and control groups.  
55  
56  
57  
58  
59  
60



Table 1. Baseline sample characteristics (n=811)

| Variable                                             | Intervention group<br>(n=406) |             | Control group<br>(n=405) |             |
|------------------------------------------------------|-------------------------------|-------------|--------------------------|-------------|
| <b>Sociodemographics</b>                             | n                             | (%)         | n                        | (%)         |
| Family history of breast cancer                      |                               |             |                          |             |
| No close blood relative ever diagnosed               | 389                           | (96%)       | 386                      | (95%)       |
| One close blood relative diagnosed<br>aged ≥50 years | 17                            | (4%)        | 19                       | (5%)        |
| Country of birth                                     |                               |             |                          |             |
| Australia or New Zealand                             | 327                           | (81%)       | 335                      | (83%)       |
| Other                                                | 79                            | (19%)       | 70                       | (17%)       |
| Main language spoken at home                         |                               |             |                          |             |
| English                                              | 390                           | (96%)       | 396                      | (98%)       |
| Other                                                | 16                            | (4%)        | 9                        | (2%)        |
| Education                                            |                               |             |                          |             |
| School only or trade certificate                     | 226                           | (56%)       | 225                      | (56%)       |
| Diploma or university degree or higher               | 180                           | (44%)       | 180                      | (44%)       |
| Marital status                                       |                               |             |                          |             |
| Married or living with a partner                     | 317                           | (78%)       | 333                      | (82%)       |
| Not currently living with a partner                  | 89                            | (22%)       | 72                       | (18%)       |
| Parent status                                        |                               |             |                          |             |
| Has one or more children                             | 361                           | (89%)       | 363                      | (90%)       |
| No children                                          | 45                            | (11%)       | 42                       | (10%)       |
| Work status                                          |                               |             |                          |             |
| Working full time or part time                       | 333                           | (82%)       | 341                      | (84%)       |
| No paid job currently                                | 73                            | (18%)       | 64                       | (16%)       |
| Age                                                  |                               |             |                          |             |
| 48-49 years old                                      | 289                           | (71%)       | 294                      | (73%)       |
| 50 years old                                         | 117                           | (29%)       | 111                      | (27%)       |
| <b>Pre-intervention measures</b>                     | <b>Mean</b>                   | <b>(SD)</b> | <b>Mean</b>              | <b>(SD)</b> |
| Stage of decision making about screening             | 3.4                           | (1.0)       | 3.4                      | (0.9)       |
| Knowledge (basic concepts of screening)              | 4.4                           | (0.8)       | 4.4                      | (0.8)       |
| Baseline attitudes to breast screening               | 26.5                          | (3.6)       | 26.8                     | (3.6)       |
| Baseline intentions about screening                  | 4.5                           | (0.8)       | 4.6                      | (0.8)       |

*Note.* All baseline variables appearing above were included as covariates in the mediation analysis (sociodemographic factors were dichotomised as shown). Possible ranges: Stage of decision making 1 (not yet thought about the options) to 4 (already made a choice), Knowledge 0 (none correct) to 5 (all correct), Attitudes 6 (least positive) to 30 (most positive), Intentions 1 (definitely not) to 5 (definitely).

Table 2 presents mean post-intervention scores for intervention and control groups on the variables included in the mediation model. Compared with controls, the intervention group showed greater knowledge about over-detection, lower worry about breast cancer, less positive attitudes towards breast screening, lower anticipated regret for not screening (versus for screening), and lower intentions to undergo screening. Correlations between these variables were significant ( $p < .001$ ) as shown in the Appendix.

Table 2. Means and standard deviations for study groups on screening intentions and mediator variables

| Variable                 | Intervention group<br>(n=406) |       | Control group<br>(n=405) |       | p value |
|--------------------------|-------------------------------|-------|--------------------------|-------|---------|
|                          | Mean                          | (SD)  | Mean                     | (SD)  |         |
| Over-detection knowledge | 6.2                           | (2.2) | 4.0                      | (1.6) | <.001   |
| Breast cancer worry      | 1.7                           | (0.7) | 1.8                      | (0.7) | <.001   |
| Screening attitudes      | 24.5                          | (4.4) | 26.1                     | (4.1) | <.001   |
| Anticipated regret       | 1.9                           | (1.7) | 2.5                      | (1.6) | <.001   |
| Screening intentions     | 4.1                           | (1.1) | 4.5                      | (0.9) | <.001   |

Note. Possible score ranges were as follows: Over-detection knowledge 0 to 10, Breast cancer worry 1 to 4, Attitudes 6 to 30, Anticipated regret -4 to 4, Intentions 1 to 5. See Appendix for further details on measures. Groups were compared here using t tests.

Serial mediation analysis found that the total indirect effect of the intervention on intentions was statistically significant, indicating that the intervention influenced intentions indirectly through its effects on the combined set of mediators. Reading the intervention rather than the control decision aid was associated with a decrease in screening intentions as a result of all specific indirect causal sequences in the model (Table 3). As the direct effect was not significant, there was no evidence that the intervention affected intentions independently of its influence on the mediators modelled. The specific path coefficients are shown in Figure 1. The figure illustrates, for example, that participants who received the intervention decision aid demonstrated greater knowledge than controls, participants with greater knowledge expressed less positive attitudes, and participants with less positive attitudes also had less positive intentions.

Table 3 presents effect estimates and 95% CIs for the 15 specific indirect effects representing causal pathways through the various mediator sequences. The main significant indirect effects of the intervention on intentions were those involving knowledge and attitudes as mediators, both separately (IE1, IE13 in Table 3) and together in sequence (IE3). The first specific indirect effect (IE1)

tested whether overdetection knowledge mediated the relationship between the decision aid received and subsequent breast screening intentions; this effect was significant. Relative to those assigned to the control decision aid, participants receiving the intervention demonstrated better knowledge about overdetection and consequently expressed lower intentions to have screening. Another significant effect, IE13 showed that the intervention resulted in less positive attitudes, which also led to lower screening intentions. IE3 tested the causal chain: intervention -> knowledge -> attitudes -> intentions. This was also significant and demonstrated that participants exposed to the intervention gained better overdetection knowledge, those with better knowledge had less positive attitudes, and these attitudes were in turn associated with reduced intentions to screen. Pair-wise contrasts revealed that the three largest specific indirect effects (IE1, IE3, and IE13) did not significantly differ in size.

Table 3. Direct and indirect effects of the intervention on intentions via four sequential mediators

| Path                                               | Effect        | SE           | 95% CI        |               |
|----------------------------------------------------|---------------|--------------|---------------|---------------|
| <b>Total effect</b>                                | <b>-.2768</b> | <b>.0540</b> | <b>-.3828</b> | <b>-.1708</b> |
| Direct effect                                      | -.0192        | .0501        | -.1175        | .0791         |
| <b>Total indirect effect</b>                       | <b>-.2576</b> | <b>.0449</b> | <b>-.3488</b> | <b>-.1734</b> |
| Specific indirect effects (IEs)                    |               |              |               |               |
| <b>1. Knowledge</b>                                | <b>-.0731</b> | <b>.0267</b> | <b>-.1281</b> | <b>-.0230</b> |
| 2. Knowledge, worry                                | -.0010        | .0017        | -.0073        | .0007         |
| <b>3. Knowledge, attitudes</b>                     | <b>-.0700</b> | <b>.0171</b> | <b>-.1071</b> | <b>-.0396</b> |
| <b>4. Knowledge, anticipated regret</b>            | <b>-.0201</b> | <b>.0072</b> | <b>-.0375</b> | <b>-.0088</b> |
| 5. Knowledge, worry, attitudes                     | -.0001        | .0007        | -.0023        | .0011         |
| 6. Knowledge, worry, anticipated regret            | -.0004        | .0005        | -.0021        | .0002         |
| <b>7. Knowledge, attitudes, anticipated regret</b> | <b>-.0121</b> | <b>.0040</b> | <b>-.0220</b> | <b>-.0059</b> |
| 8. Knowledge, worry, attitudes, anticipated regret | -.0000        | .0001        | -.0004        | .0021         |
| 9. Worry                                           | -.0047        | .0050        | -.0191        | .0021         |
| 10. Worry, attitudes                               | -.0003        | .0027        | -.0063        | .0046         |
| <b>11. Worry, anticipated regret</b>               | <b>-.0020</b> | <b>.0014</b> | <b>-.0063</b> | <b>-.0003</b> |
| 12. Worry, attitudes, anticipated regret           | -.0001        | .0005        | -.0012        | .0008         |
| <b>13. Attitudes</b>                               | <b>-.0618</b> | <b>.0285</b> | <b>-.1178</b> | <b>-.0065</b> |
| <b>14. Attitudes, anticipated regret</b>           | <b>-.0106</b> | <b>.0056</b> | <b>-.0241</b> | <b>-.0016</b> |
| 15. Anticipated regret                             | -.0012        | .0104        | -.0216        | .0200         |

Note. n=811; 50,000 bootstrap samples; bias-corrected confidence intervals. The sequential mediators are: overdetection knowledge, breast cancer worry, attitudes, anticipated regret. Bold effects are significant ( $p < .05$ ).

1  
2  
3 The anticipated regret variable was also involved in several significant mediation pathways,  
4 influenced by knowledge and attitudes separately (IE4, IE14) and together (IE7). The most complex  
5 of the significant indirect effects was IE7 leading from the intervention -> over detection knowledge -  
6 > screening attitude -> anticipated regret -> screening intention. Compared with the control group,  
7 women receiving the intervention had greater over detection knowledge, which led to less positive  
8 attitudes (as above); these were in turn associated with lower anticipated regret for not screening  
9 (versus screening), which translated into reduced intentions to screen.  
10

11  
12 The specific indirect effect for the pathway through the complete causal chain involving all four  
13 mediators in sequence (IE8) – that is, adding breast cancer worry to the mediators discussed above –  
14 was not significant. Worry was part of only one significant indirect effect (IE11). The intervention  
15 reduced breast cancer worry; women with lower worry had lower anticipated regret for not  
16 screening, which again reduced screening intentions.  
17  
18  
19  
20  
21  
22  
23  
24  
25

## 26 DISCUSSION

27  
28 This study showed that the relationship between exposure to information on over detection and  
29 women's subsequent breast screening intentions was mediated by multiple cognitive and affective  
30 pathways. The intervention decision aid substantially improved understanding of over detection, and  
31 it influenced – both directly and indirectly via its effect on knowledge – women's attitudes towards  
32 having screening. The mediation analysis revealed that these mechanisms involving knowledge and  
33 attitudes were particularly important in determining intentions about screening participation.  
34 Anticipated regret played a role in several additional pathways linking knowledge, attitudes and  
35 intentions. As women became more knowledgeable about over detection and their screening  
36 attitudes became less positive, this lessened their expectation that *not* screening would cause regret  
37 and increased the realisation that *screening* might cause regret, which in turn influenced intentions.  
38 The non-significance of the direct effect (i.e., relationship between study group and intentions after  
39 adjusting for all mediators) confirms that our model captured the key relevant constructs, suggesting  
40 little of the observed total effect was due to other differences between the intervention and control  
41 decision aids (e.g., length, newness of information, and time spent reading).  
42  
43  
44  
45  
46  
47  
48  
49  
50  
51

52 The randomised controlled trial design is a key strength of this study. Random allocation between  
53 two decision aids, differing only in the presence or absence of information about over detection,  
54 enabled a rigorous test of the specific effects of this information when described in the context of  
55 other screening outcomes. Our serial mediation model controlled for a comprehensive set of  
56  
57  
58  
59  
60

1  
2  
3 baseline variables and examined plausible, theory-driven cause-effect relationships between  
4 exposure to the intervention and subsequently measured variables. Nonetheless, a limitation is that  
5 given the cross-sectional nature of the outcome and mediator data, we cannot definitively establish  
6 the causal sequence of these variables. While some of the group differences shown in Table 2 are  
7 small, our purpose in this article was not to establish the clinical significance of such differences (see  
8 elsewhere for more detailed analysis [16]) but rather to explore possible causal mechanisms  
9 involved. Whether the outcome variables in the serial mediation model are normally distributed or  
10 not, the inferences are likely to remain valid due to the large sample size of the study.[22, 29]  
11 Participants had not been screened in the 2 years prior to the study and were close to the age (50) at  
12 which women are invited into the Australian national breast screening program. Intervention effects  
13 could vary in other populations depending on age and cultural context. For example, providing  
14 information about over-detection to women who already have more personal experience with  
15 screening (e.g., women in their sixties) might produce less of an effect on attitudes and intentions,  
16 as suggested by our previous qualitative research.[30]  
17  
18  
19  
20  
21  
22  
23  
24  
25

26 Although previous literature has reported on screening decisions aided by decision support  
27 techniques,[31, 32] little work to date has examined mechanisms for *how* information provided in  
28 such resources translates into decisions. Our mediation findings are in line with the explanatory  
29 account of health decisions offered by the theory of planned behaviour.[27, 28] Under this theory,  
30 attitudes towards a behaviour are determined by salient beliefs about its consequences (in this case,  
31 the understanding conveyed by the decision aid that over-detection is a possible consequence of  
32 screening); these attitudes in turn determine intentions. Our observed mediation effects involving  
33 anticipated regret accord with other empirical evidence supporting its usefulness as an extension to  
34 the theory of planned behaviour.[33] Worry about the threat of breast cancer, though emphasised  
35 by other health psychology theories, did not appear to play a major role in determining screening  
36 intentions among our study participants. While the power of emotion has been cited as a challenge  
37 for communicating harms of mammography,[34] our findings reinforce the vital role of good  
38 educational materials by demonstrating how evidence-based information influenced women's  
39 cognitions about screening and showing that cognitions, rather than emotions, were instrumental in  
40 decision making. Utilising a theoretical basis in behavioural psychology or decision making theory is  
41 often overlooked but may strengthen the design and evaluation of decision support materials,  
42 although operationalizing such theories can be challenging.[20] There is a need to develop and  
43 employ comprehensive theoretical frameworks that help us better understand the role of  
44 comprehension of benefits and harms in shaping informed screening decisions, as well as how  
45  
46  
47  
48  
49  
50  
51  
52  
53  
54  
55  
56  
57  
58  
59  
60

1  
2  
3 external factors – such as conflicting information from different sources – may influence both  
4 information processing and decision making in this sometimes controversial area.[2, 35-37]  
5  
6  
7  
8

## 9 **CONCLUSIONS**

10 We have previously shown that giving women evidence-based written information about  
11 overdetection in breast screening can change women's screening intentions. Importantly, for the  
12 first time we now provide evidence, using mediation analysis, of how this cognitive and affective  
13 process works: the decision aid intervention achieved substantial knowledge gains, and thereby  
14 influenced attitudes and intentions towards screening. Our findings underline the importance of  
15 providing good-quality information to women when they are invited to consider screening, using  
16 materials with the capacity to successfully impart new and relevant knowledge. Effective  
17 communication tools and decision support resources are especially needed against a background of  
18 widely documented unrealistic public expectations of screening which may be driven by  
19 psychological factors in combination with sometimes misleading messages about benefits and lack  
20 of attention to harms.[38, 39] Our findings are a reminder that information can be a powerful  
21 intervention, and that the development of information resources must be done properly with rigour  
22 and care.  
23  
24  
25  
26  
27  
28  
29  
30  
31  
32  
33  
34  
35  
36  
37  
38  
39  
40  
41  
42  
43  
44  
45  
46  
47  
48  
49  
50  
51  
52  
53  
54  
55  
56  
57  
58  
59  
60

## DECLARATIONS

### Ethics approval and consent to participate

This study was approved by The University of Sydney human research ethics committee (2012/1429). Participants gave informed consent to take part in the study.

### Patient consent for publication

Not applicable

### Availability of data and material

The datasets used and/or analysed during the current study are available from the corresponding author on reasonable request.

### Funding

This work was supported by the National Health and Medical Research Council of Australia through Project Grant number 1062389.

### Competing interests

All authors have completed the ICMJE uniform disclosure form at [www.icmje.org/coi\\_disclosure.pdf](http://www.icmje.org/coi_disclosure.pdf) and declare: financial support from the National Health and Medical Research Council of Australia for the submitted work; no financial relationships with any organisations that might have an interest in the submitted work in the previous three years; no other relationships or activities that could appear to have influenced the submitted work.

### Authors' contributions

All authors contributed to study design. KMcC, AB, JJ, NH, HD, and KMcG obtained funding. JH, KMcC, and JJ led development of the intervention and implementation of the trial. KMcG advised on the statistical analysis. JH performed the statistical analysis, produced the tables and figure, and drafted the manuscript. All authors contributed to data interpretation and critically reviewed the manuscript.

### Acknowledgements

We thank Hazel Thornton for her contribution to the research project over many years, and for helpful comments on an earlier draft of this manuscript.

## REFERENCES

- 1 Harvey S. The charge and the challenges of breast cancer screening. *J Womens Health (Larchmt)* 2014;23(Suppl 1):S1-2. doi: 10.1089/jwh.2014.1509
- 2 Elmore JG. Breast cancer screening: balancing evidence with culture, politics, money, and media. In: Houssami N, Miglioretti D, eds. *Breast Cancer Screening: An Examination of Scientific Evidence*. Amsterdam: Elsevier 2016:1-27.
- 3 Welch HG, Black W. Overdiagnosis in cancer. *J Natl Cancer Inst* 2010;102:605-13. doi: 10.1093/jnci/djq099
- 4 Independent UK Panel on Breast Cancer Screening. The benefits and harms of breast cancer screening: an independent review. *Lancet* 2012;380:1778-86. doi: 10.1016/S0140-6736(12)61611-0
- 5 Jacklyn G, Glasziou P, Macaskill P, et al. Meta-analysis of breast cancer mortality benefit and overdiagnosis adjusted for adherence: improving information on the effects of attending screening mammography. *Br J Cancer* 2016;114:1269-76. doi: 10.1038/bjc.2016.90
- 6 Heath I. It is not wrong to say no. *BMJ* 2009;338:b2529. doi: 10.1136/bmj.b2529
- 7 Kirwan C. Breast cancer screening: what does the future hold? *BMJ* 2013;346:f87. doi: 10.1136/bmj.f87
- 8 Stefanek M. Uninformed compliance or informed choice? A needed shift in our approach to cancer screening. *J Natl Cancer Inst* 2011;103:1821-26. doi: 10.1093/jnci/djr474
- 9 Gummersbach E, Piccoliori G, Oriol Zerbe C, et al. Are women getting relevant information about mammography screening for an informed consent: a critical appraisal of information brochures used for screening invitation in Germany, Italy, Spain and France. *Eur J Public Health* 2010;20:409-14. doi: 10.1093/eurpub/ckp174
- 10 Jorgensen K, Gotzsche P. Content of invitations for publicly funded screening mammography. *BMJ* 2006;332:538-41. doi: 10.1136/bmj.332.7540.538
- 11 Zapka J, Geller B, Bulliard J, et al. Print information to inform decisions about mammography screening participation in 16 countries with population-based programs. *Patient Educ Couns* 2006;63:126-37. doi: 10.1016/j.pec.2005.09.012
- 12 Welch HG, Passow H. Quantifying the benefits and harms of screening mammography. *JAMA Intern Med* 2014;174:448-54. doi: 10.1001/jamainternmed.2013.13635
- 13 Loberg M, Lousdal ML, Bretthauer M, et al. Benefits and harms of mammography screening. *Breast Cancer Res* 2015;17:63. doi: 10.1186/s13058-015-0525-z
- 14 Biller-Andorno N, Juni P. Abolishing mammography screening programs? A view from the Swiss Medical Board. *N Engl J Med* 2014;370:1965-67. doi: 10.1056/NEJMp1401875
- 15 Schwartz L, Woloshin S, Sox H, et al. US women's attitudes to false positive mammography results and detection of ductal carcinoma in situ: cross sectional survey. *BMJ* 2000;320:1635-40. doi: 10.1136/bmj.320.7250.1635
- 16 Hersch J, Barratt A, Jansen J, et al. Use of a decision aid including information on overdiagnosis to support informed choice about breast cancer screening: a randomised controlled trial. *Lancet* 2015;385:1642-52. doi: 10.1016/S0140-6736(15)60123-4
- 17 Hersch J, Jansen J, Barratt A, et al. Overdiagnosis in breast cancer screening: development and preliminary evaluation of a decision aid. *BMJ Open* 2014;4:e006016. doi: 10.1136/bmjopen-2014-006016
- 18 Riddle M, Science of Behavior Change Working Group. News from the NIH: using an experimental medicine approach to facilitate translational research. *Transl Behav Med* 2015;5(4):486-8. doi: 10.1007/s13142-015-0333-0
- 19 Kronen T, Keller H, Becker A, et al. The theory of planned behaviour in a randomized trial of a decision aid on cardiovascular risk prevention. *Patient Educ Couns* 2010;78(2):169-76. doi: 10.1016/j.pec.2009.06.010



- 1  
2  
3 20 Elwyn G, Stiel M, Durand MA, et al. The design of patient decision support interventions:  
4 addressing the theory-practice gap. *J Eval Clin Pract* 2011;17:565-74. doi: 10.1111/j.1365-  
5 2753.2010.01517.x  
6  
7 21 Armitage CJ, Conner M. Social cognition models and health behaviour: a structured review.  
8 *Psychol Health* 2000;15:173-89. doi: 10.1080/08870440008400299  
9  
10 22 Hayes AF. Introduction to Mediation, Moderation, and Conditional Process Analysis: A  
11 Regression-Based Approach. New York: Guilford 2013:xvii, 507.  
12  
13 23 Hersch J, Barratt A, Jansen J, et al. The effect of information about overdetection of breast cancer  
14 on women's decision-making about mammography screening: study protocol for a randomised  
15 controlled trial. *BMJ Open* 2014;4:e004990. doi: 10.1136/bmjopen-2014-004990  
16  
17 24 Dormandy E, Michie S, Hooper R, et al. Informed choice in antenatal Down syndrome screening: a  
18 cluster-randomised trial of combined versus separate visit testing. *Patient Educ Couns*  
19 2006;61:56-64. doi: 10.1016/j.pec.2005.02.006  
20  
21 25 Sandberg T, Hutter R, Richetin J, et al. Testing the role of action and inaction anticipated regret on  
22 intentions and behaviour. *Br J Soc Psychol* 2016;55:407-25. doi: 10.1111/bjso.12141  
23  
24 26 Sivell S, Elwyn G, Edwards A, et al. Factors influencing the surgery intentions and choices of  
25 women with early breast cancer: the predictive utility of an extended theory of planned  
26 behaviour. *BMC Med Inform Decis Mak* 2013;13:92. doi: 10.1186/1472-6947-13-92  
27  
28 27 Ajzen I. The theory of planned behavior. *Organ Behav Hum Decis Process* 1991;50:179-211. doi:  
29 10.1016/0749-5978%2891%2990020-T  
30  
31 28 Ajzen I. Martin Fishbein's legacy: the reasoned action approach. *Ann Am Acad Pol Soc Sci*  
32 2012;640:11-27. doi: 10.1177/0002716211423363  
33  
34 29 Lumley T, Diehr P, Emerson S, et al. The importance of the normality assumption in large public  
35 health data sets. *Annu Rev Public Health* 2002;23:151-69. doi:  
36 10.1146/annurev.publhealth.23.100901.140546  
37  
38 30 Hersch J, Jansen J, Barratt A, et al. Women's views on overdiagnosis in breast cancer screening: a  
39 qualitative study. *BMJ* 2013;346:f158. doi: 10.1136/bmj.f158  
40  
41 31 Biesecker B, Schwartz M, Marteau T. Enhancing informed choice to undergo health screening: a  
42 systematic review. *Am J Health Behav* 2013;37:351-59. doi: 10.5993/AJHB.37.3.8  
43  
44 32 van Agt H, Korfage I, Essink-Bot M. Interventions to enhance informed choices among invitees of  
45 screening programmes – a systematic review. *Eur J Public Health* 2014;24:789-801. doi:  
46 10.1093/eurpub/ckt205  
47  
48 33 Sandberg T, Conner M. Anticipated regret as an additional predictor in the theory of planned  
49 behaviour: a meta-analysis. *Br J Soc Psychol* 2008;47:589-606. doi: 10.1348/014466607X258704  
50  
51 34 Rosenbaum L. Invisible risks, emotional choices – mammography and medical decision making. *N*  
52 *Engl J Med* 2014;371(16):1549-52. doi: 10.1056/NEJMms1409003  
53  
54 35 Steckelberg A, Kasper J, Mühlhauser I. Selective information seeking: can consumers' avoidance  
55 of evidence-based information on colorectal cancer screening be explained by the theory of  
56 cognitive dissonance? *German Medical Science* 2007;5:Doc05.  
57  
58 36 Baena-Canada JM, Rosado-Varela P, Exposito-Alvarez I, et al. Using an informed consent in  
59 mammography screening: a randomized trial. *Cancer Med* 2015;4:1923-32. doi:  
60 10.1002/cam4.525  
61  
62 37 Petrova D, Garcia-Retamero R, Catena A, et al. To screen or not to screen: What factors influence  
63 complex screening decisions? *J Exp Psychol Appl* 2016;22:247-60. doi: 10.1037/xap0000086  
64  
65 38 Hoffmann T, Del Mar C. Patients' expectations of the benefits and harms of treatments,  
66 screening, and tests: a systematic review. *JAMA Intern Med* 2015;175:274-86. doi:  
67 10.1001/jamainternmed.2014.6016  
68  
69 39 Hersch JK, Nickel BL, Ghanouni A, et al. Improving communication about cancer screening:  
70 moving towards informed decision making. *Public Health Res Pract* 2017;27:e2731728. doi:  
10.17061/phrp2731728

**FIGURES**

Fig. 1. Title: Multiple mediation model of decision aid effects on breast screening intentions via four sequential mediators

Fig. 1. Legend: Graphic representation of the serial multiple mediation model of decision aid effects on breast screening intentions via four sequential mediators (overdetection knowledge, breast cancer worry, screening attitudes, and anticipated regret). The intervention was hypothesised to exert an effect on screening intentions through the four mediators in sequence. Outcome and mediator variables were standardised prior to analysis. Bold coefficients are significant ( $p < .05$ ). Analyses controlled for baseline measures including screening intentions and attitudes, basic screening knowledge, stage of decision making, breast cancer family history, birthplace, main language spoken, education, marital status, parent status, work status, and age.

1  
2  
3  
4  
5  
6  
7  
8  
9  
10  
11  
12  
13  
14  
15  
16  
17  
18  
19  
20  
21  
22  
23  
24  
25  
26  
27  
28  
29  
30  
31  
32  
33  
34  
35  
36  
37  
38  
39  
40  
41  
42  
43  
44  
45  
46  
47  
48  
49  
50  
51  
52  
53  
54  
55  
56  
57  
58  
59  
60



Multiple mediation model of decision aid effects on breast screening intentions via four sequential mediators

Graphic representation of the serial multiple mediation model of decision aid effects on breast screening intentions via four sequential mediators (overdetection knowledge, breast cancer worry, screening attitudes, and anticipated regret). The intervention was hypothesised to exert an effect on screening intentions through the four mediators in sequence. Outcome and mediator variables were standardised prior to analysis. Bold coefficients are significant ( $p < .05$ ). Analyses controlled for baseline measures including screening intentions and attitudes, basic screening knowledge, stage of decision making, breast cancer family history, birthplace, main language spoken, education, marital status, parent status, work status, and age.

87x225mm (300 x 300 DPI)

1  
2  
3  
4  
5  
6  
7  
8  
9  
10  
11  
12  
13  
14  
15  
16  
17  
18  
19  
20  
21  
22  
23  
24  
25  
26  
27  
28  
29  
30  
31  
32  
33  
34  
35  
36  
37  
38  
39  
40  
41  
42  
43  
44  
45  
46  
47  
48  
49  
50  
51  
52  
53  
54  
55  
56  
57  
58  
59  
60

For peer review only

1  
2  
3 **SUPPLEMENTARY APPENDIX**  
4

5  
6 **Measurement of outcome and mediator variables used in:**  
7

8 **Hersch J et al. How information about overdetection changes breast cancer screening decisions:**  
9 **a mediation analysis within a randomised controlled trial**  
10

11  
12  
13 This appendix contains the questions used for the measures included in the mediation analysis,  
14 including the range of available response options, and describes how each score was calculated.  
15 Correlations among the set of variables are also presented.  
16

17  
18  
19 The questions were administered during a structured, computer-assisted telephone interview that  
20 took place after the participant had read her allocated decision aid.  
21  
22  
23  
24  
25  
26  
27  
28  
29  
30  
31  
32  
33  
34  
35  
36  
37  
38  
39  
40  
41  
42  
43  
44  
45  
46  
47  
48  
49  
50  
51  
52  
53  
54  
55  
56  
57  
58  
59  
60

### Knowledge about overdetection

OC1. Who do you think is more likely to be diagnosed with breast cancer?

- Women who have screening mammograms [1]
- Women who do not have screening mammograms [0]

OC2. All breast cancers will eventually cause illness and death if they are not found and treated.

- TRUE [0]
- FALSE [1]

OC3. When screening finds cancer, doctors can reliably predict whether it will ever cause harm.

- TRUE [0]
- FALSE [1]

OC4. Even breast cancers that may not cause any health problems are likely to be treated.

- TRUE [1]
- FALSE [0]

OC5. Screening leads some women with a harmless cancer to get treatment they do not need.

- TRUE [1]
- FALSE [0]

OC6. Screening finds harmless cancers more often than it prevents death from breast cancer.

- TRUE [1]
- FALSE [0]

OC7. Which of these 2 statements best describes over-detection?

- Screening finds a cancer that would never have caused trouble [1]
- Screening finds an abnormality but extra tests show it is not cancer [0]

*I would like you to imagine 1000 ordinary women who are 50 years old.*

BN1. *If these 1,000 women have breast screening every 2 years for 20 years, in that time about how many women do you think will avoid dying from breast cancer because of screening?*

\_\_\_\_\_

ON1. *If these 1,000 women have screening every 2 years for 20 years, in that time about how many will be diagnosed and treated for a breast cancer that is not harmful?*

\_\_\_\_\_

1 mark was awarded if the answer given for ON1 was greater than the answer given for BN1.

1 mark was awarded if the answer given for ON1 was between 6 and 57. An additional

1 mark was awarded if the answer given for ON1 was between 10 and 38.

**Marks were allocated as indicated above, and summed for a total score ranging between 0 and 10. Higher scores reflect better knowledge.**

### Attitudes to breast screening

For you, having breast screening is: Beneficial

- Strongly agree [5]
- Agree [4]
- Neither agree nor disagree [3]
- Disagree [2]
- Strongly disagree [1]

For you, having breast screening is: A good thing

- Strongly agree [5]
- Agree [4]
- Neither agree nor disagree [3]
- Disagree [2]
- Strongly disagree [1]

For you, having breast screening is: Harmful

- Strongly agree [1]
- Agree [2]
- Neither agree nor disagree [3]
- Disagree [4]
- Strongly disagree [5]

For you, having breast screening is: Worthwhile

- Strongly agree [5]
- Agree [4]
- Neither agree nor disagree [3]
- Disagree [2]
- Strongly disagree [1]

For you, having breast screening is: Important

- Strongly agree [5]
- Agree [4]
- Neither agree nor disagree [3]
- Disagree [2]
- Strongly disagree [1]

For you, having breast screening is: A bad thing

- Strongly agree [1]
- Agree [2]
- Neither agree nor disagree [3]
- Disagree [4]
- Strongly disagree [5]

**Scores were allocated as indicated above, and summed for a total score ranging between 6 and 30. Higher scores reflect more positive attitudes.**

### Anticipated regret

If you do NOT have breast screening in the next few years, you may later wish you DID.

- Strongly agree [5]
- Agree [4]
- Neither agree nor disagree [3]
- Disagree [2]
- Strongly disagree [1]

Higher scores above indicate greater anticipated regret for *not* screening (inaction score).

If you DO have breast screening in the next few years, you may later wish you did NOT.

- Strongly agree [5]
- Agree [4]
- Neither agree nor disagree [3]
- Disagree [2]
- Strongly disagree [1]

Higher scores above indicate greater anticipated regret for screening (action score).

**The action score was subtracted from the inaction score to produce a differential anticipated regret score ranging between -4 and 4. Higher scores reflect greater anticipated regret for *not* screening, adjusted for anticipated regret for screening.**

### Worry about breast cancer

How worried are you about developing breast cancer?

- Not worried at all [0]
- A bit worried [1]
- Quite worried [2]
- Very worried [3]

**Scores were allocated as indicated above. Higher scores reflect greater worry.**

### Intentions about breast screening

At the moment, which of the following best describes your intentions about having breast screening within the next 2-3 years?

- You definitely will have breast screening [5]
- You are likely to have breast screening [4]
- You are unsure [3]
- You are not likely to have breast screening [2]
- You definitely will not have breast screening [1]

**Scores were allocated as indicated above. Higher scores reflect more positive intentions.**



**Correlation matrix**

|                         | Overdetection knowledge | Breast cancer worry | Screening attitudes | Anticipated regret | Screening intentions |
|-------------------------|-------------------------|---------------------|---------------------|--------------------|----------------------|
| Overdetection knowledge | 1                       | -.137               | -.216               | -.251              | -.239                |
| Breast cancer worry     | -.137                   | 1                   | .139                | .184               | .181                 |
| Screening attitudes     | -.216                   | .139                | 1                   | .634               | .730                 |
| Anticipated regret      | -.251                   | .184                | .634                | 1                  | .609                 |
| Screening intentions    | -.239                   | .181                | .730                | .609               | 1                    |

Note. n=811. All correlations are significant ( $p < .001$ ).
